# Supplementary material for: Efficient CRISPR/Cas-Mediated Targeted Mutagenesis in Spring and Winter Wheat Varieties
Source: MDPI journal article supplement (doi:10.3390/plants10071481), 2021-07-19
Supplement: s1 [file s1]

**Table S1**

Primers used for genotyping of transgenic lines.

| Primer      | 5'-3' Sequence                                  |
|-------------|-------------------------------------------------|
| UbiPro4     | TTTAGCCCTGCCTTCATACG                            |
| WheatCas9R1 | GGATTAAGGTCGCCTTCGATGAGG                        |
| M13F        | GTAAAACGACGGCCAGT                               |
| M13R        | CAGGAAACAGCTATGAC                               |
| Bar1        | GTCTGCACCATCGTCAACC                             |
| Bar2        | GAAGTCCAGCTGCCAGAAAC                            |
| FH41        | GAGATTTCTGCTGAGATCCTACAT                        |
| FH42        | GGATTATTACCAAACTGTGACAAT                        |
| FH43        | CTGAAAGAGAAGAAGGTGGAGAT                         |
| FH44        | GCTATCTGTCGGTCATCATGTAC                         |
| FH46        | TCAAACGGTGTAGCGGTTCTT                           |
| FH56        | GTATGATCAGATTTTCCGTCCG                          |
| FH57        | TGAACAGCTTCGTTACTGGCAG                          |
| FH59        | TGTCCAAAAGCAATCCGACC                            |
| FH147       | GATGCGGAAGGTCAGGATCT                            |
| FH168       | AGCAAGTTGAATGTGGGAGC                            |
| FH187       | GTGGTCTCCGGCAACAAAGCACCAGTGGTCT                 |
| FH188       | TAGGTCTCAATGTGGGAGCTGCACCAGCCGGAATC             |
| FH189       | GTGGTCTCCACATTCAACTTGCTGTTTCAGAGCTATGCTGGGAACA  |
| FH190       | TAGGTCTCAGTTCGACAACTGCACCAGCCGGAATC             |
| FH191       | GTGGTCTCCGAACCAGAAGGTCCGTTTCAGAGCTATGCTGGGAACA  |
| FH192       | TAGGTCTCACCACACCTTCTGCACCAGCCGGAATC             |
| FH193       | GTGGTCTCCGTGGATGGGGTGGAGTTTCAGAGCTATGCTGGGAACA  |
| FH194       | TAGGTCTCAATGGACCATCTGCACCAGCCGGAATC             |
| FH195       | GTGGTCTCCCCATTTACCGCCATGTTTCAGAGCTATGCTGGGAACA  |
| FH196       | TAGGTCTCAAACCTCTTCTGCACCAGCCGGAATC              |
| FH197       | GTGGTCTCCAGTTTCTGGACTACAGTTTCAGAGCTATGCTGGGAACA |
| FH198       | GTGCGGTCTCAAACAAAAAAGCACCAGCTCGGTGCCACT         |
| FH199       | TAGGTCTCACGAAGAGTTCTGCACCAGCCGGAATC             |
| FH200       | GTGGTCTCCTTCGACGGTGTGAGTTTCAGAGCTATGCTGGGAACA   |
| FH201       | TAGGTCTCATACCCAGCCTGCACCAGCCGGAATC              |
| FH202       | GTGGTCTCCGGTAGAACCAAAGTGTTCAGAGCTATGCTGGGAACA   |
| FH203       | TAGGTCTCATTATCCTGTCTGCACCAGCCGGAATC             |
| FH204       | GTGGTCTCCATAAGCTTTCATTAGTTTCAGAGCTATGCTGGGAACA  |
| FH205       | TAGGTCTCACATCCAGACCTGCACCAGCCGGAATC             |
| FH206       | GTGGTCTCCGATGTCGTACCAGAGTTTCAGAGCTATGCTGGGAACA  |
| FH207       | TAGGTCTCAGCTTCGACCTGCACCAGCCGGAATC              |
| FH208       | GTGGTCTCCAAGCTGCGCTCCCGGTTTCAGAGCTATGCTGGGAACA  |
| FH209       | TGAAGCCTTTCAGGACATGTAT                          |
| FH210       | CACTATAGGGCGAATTGGAGA                           |
| FH221       | TAGAAAAGCCCGCGACTTTC                            |
| FH224       | ATTAGCTGAGGCGGTTTCAATCT                         |
| FH227       | TGTAAAACGACGGCCAGTTTTGGCGCTCTCATTATGTAT         |
| FH228       | CCTCTCTATGGGCAGTCGGTGATAGGAATCGCAACTTAAGAGTT    |
| FH230       | CCTCTCTATGGGCAGTCGGTGATCATGCCACAGCATATCCT       |
| FH431       | TCCCCATCCAAAACCTCG                              |
| FH445       | TGTTCACCAATCATTGCCAGC                           |
| FH447       | ATTTACCAGATAAGCATTGGCAA                         |

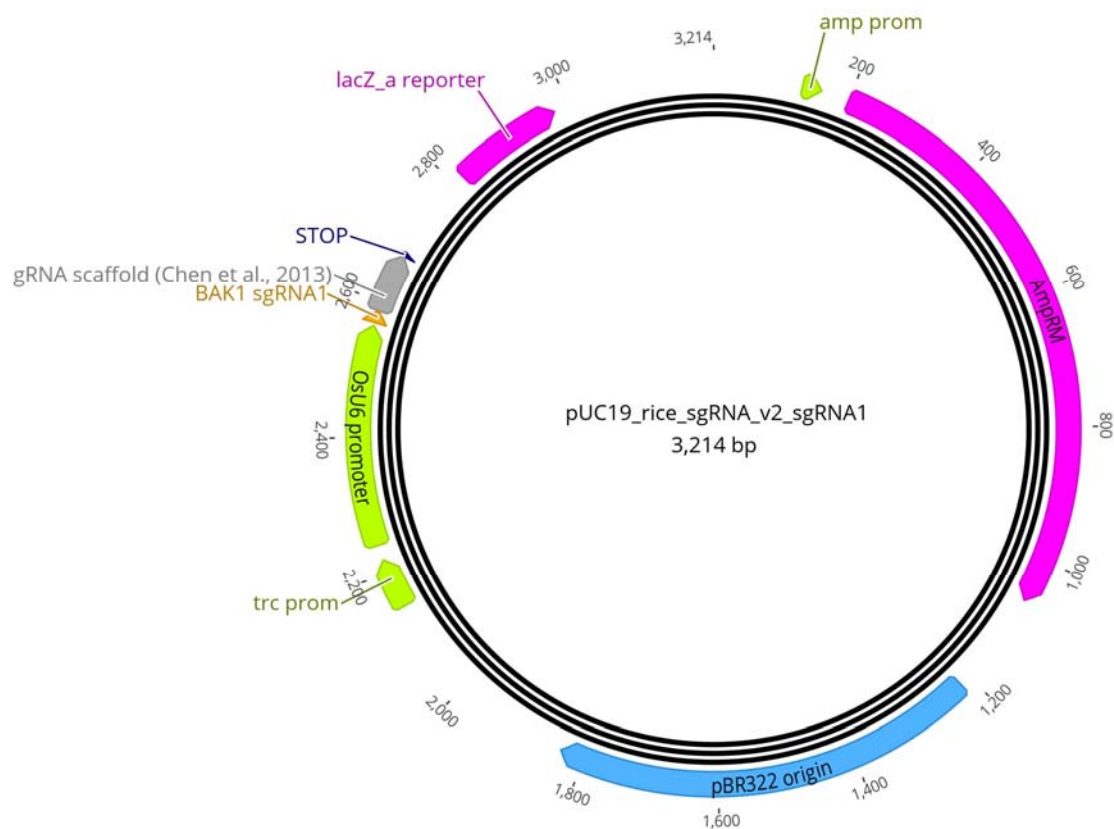

AAGAACGAACTAAGCCGGACAAAAAAGGAGCACATATACAAACCGGTTTTATTTCATGAATGGTCACGATGGATGATGG  
 GGCTCAGACTTGAGCTACGAGGCCGAGGCGAGAGAAGCCTAGTGTGCTCTCTGCTTGTTTGGGCCGTAACGGAGGATA  
 CGGCCGACGAGCGTGTACTACCGCGCGGGATGCCGCTGGGCGCTGCGGGGGCCGTTGGATGGGGATCGGTGGGTCCGCG  
 GAGCGTTGAGGGGAGACAGGTTTAGTACCACCTCGCCTACCGAACAATGAAGAACCCACCTTATAACCCCGCGCGCTGC  
 CGCTTG**TGTTGTCAAGTTC**CGAG**TTCCA**AGTTTAAGAGCTATGCTGGAAACAGCATAGCAAGTTTAAATAAGGCTAGT  
 CCGTTATCAACTTGAAAAAGTGGCACCGAGTCGGTGCTTTTTTTT

OsU6 promoter

gRNA scaffold (Chen et al., 2013)

PolyT STOP

Target sequence

**Figure S1**

pUC19\_rice\_sgRNA\_v2\_sgRNA1 construct map and insert sequence.

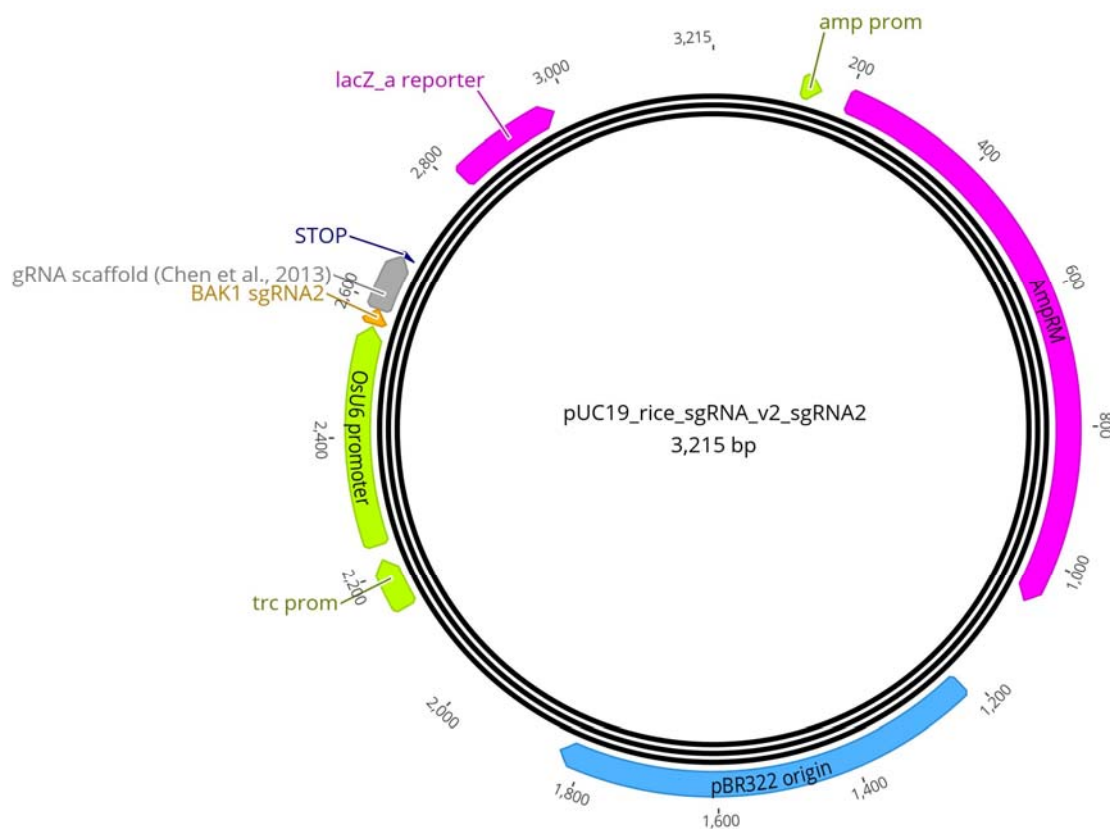

AAGAACGAACTAAGCCGGACAAAAAAGGAGCACATATACAAACCGGTTTTATTTCATGAATGGTCACGATGGATGATGG  
 GGCTCAGACTTGAGCTACGAGGCCGAGGCGAGAGAAGCCTAGTGTGCTCTCTGCTTGTTTGGGCCGTAAACGGAGGATA  
 CGGCCGACGAGCGTGTACTACCGCGCGGGATGCCGCTGGGCGCTGCGGGGGCCGTTGGATGGGGATCGGTGGGTGCGCG  
 GAGCGTTGAGGGGAGACAGGTTTAGTACCACCTCGCCTACCGAACAATGAAGAACCACCTTATAACCCGCGCGCTGC  
 CGCTTG**TGTTGAACTTGGAGGGTGCTAATAT**GTTTAAGAGCTATGCTGGAAACAGCATAGCAAGTTTAAATAAGGCTAG  
 TCCGTTATCAACTTGAAAAAGTGGCACCGAGTCGGTGCTTTTTTTTT

OsU6 promoter

gRNA scaffold (Chen et al., 2013)

PolyT STOP

Target sequence

**Figure S2**

pUC19\_rice\_sgRNA\_v2\_sgRNA2 construct map and insert sequence.

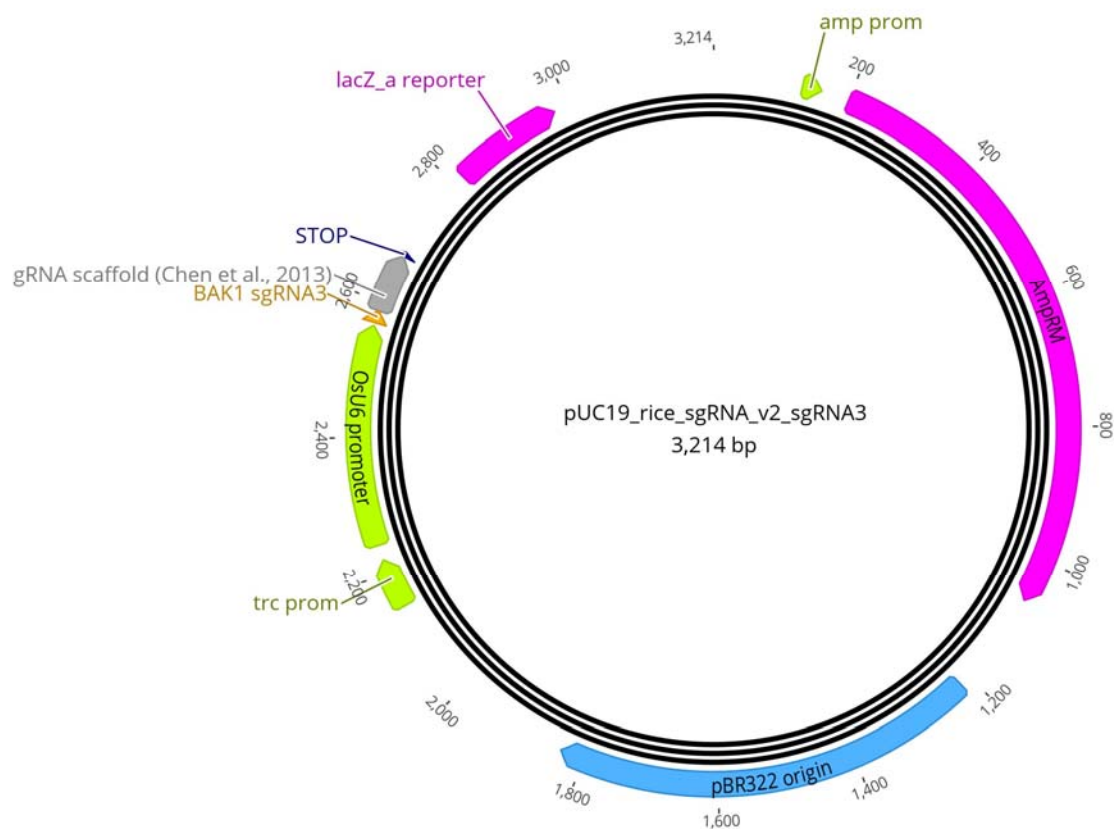

AAGAACGAACTAAGCCGGACAAAAAAGGAGCACATATACAAACCGGTTTTATTTCATGAATGGTCACGATGGATGATGG  
 GGCTCAGACTTGAGCTACGAGGCCGAGGCGAGAGAAGCCTAGTGTGCTCTCTGCTTGTTTGGGCCGTAACGGAGGATA  
 CGGCCGACGAGCGTGTACTACCGCGCGGGATGCCGCTGGGCGCTGCGGGGGCCGTTGGATGGGGATCGGTGGGTCCGCG  
 GAGCGTTGAGGGGAGACAGGTTTAGTACCACCTCGCCTACCGAACAATGAAGAACCACCTTATAACCCCGCGCGCTGC  
 CGCTTG**TGTTGATCCAGTCGTTGTTTCGCG**GTTTAAGAGCTATGCTGGAAACAGCATAGCAAGTTTAAATAAGGCTAGT  
 CCGTTATCAACTTGAAAAAGTGGCACCGAGTCGGTGCTTTTTTTT

OsU6 promoter

gRNA scaffold (Chen et al., 2013)

PolyT STOP

Target sequence

**Figure S3**

pUC19\_rice\_sgRNA\_v2\_sgRNA3 construct map and insert sequence.

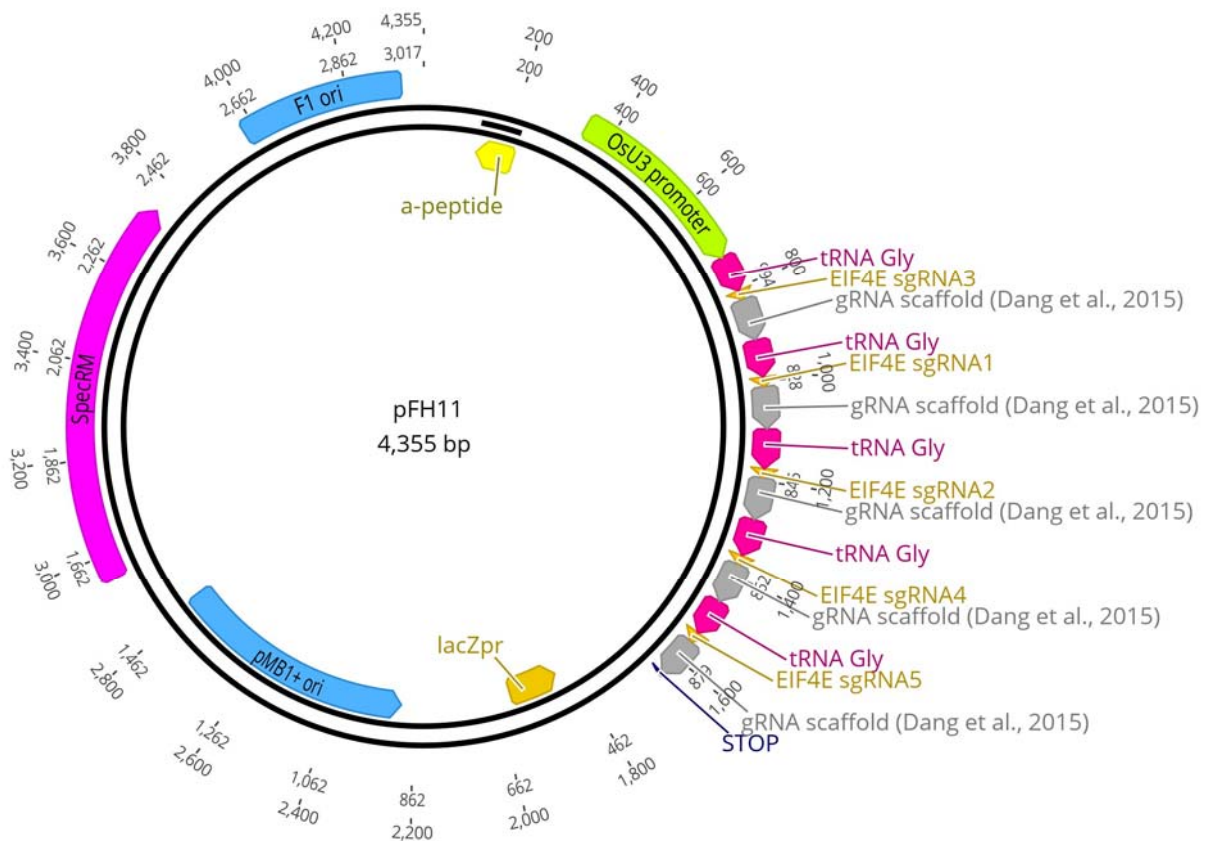

AAGCTTAAGGAATCTTTAAACATACGAACAGATCACTTAAAGTTCTTCTGAAGCAACTTAAAGTTATCAGGCATGCATG  
 GATCTTGGAGGAATCAGATGTGCAGTCAGGGACCATAGCACAAAGACAGGCGTCTTCTACTGGTGCTACCAGCAAATGCT  
 GGAAGCCGGGAACACTGGGTACGTTGGAACACACGTGATGTGAAGAAGTAAGATAAACTGTAGGAGAAAAGCATTTCGT  
 AGTGGGCCATGAAGCCTTTCAGGACATGTATTGCAGTATGGGCCGGCCATTACGCAATTGGACGACAACAAGACTAG  
 TATTAGTACCACCTCGGCTATCCACATAGATCAAAGCTGATTTAAAGAGTTGTGCAGATGATCCGTGGCAACAAAGCA  
 CCAGTGGTCTAGTGGTAGAATAGTACCCTGCCACGGTACAGACCCGGGTTTCGATTCCCGGCTGGTGCACTCCACATT  
 CAACTTGCCTGTTTCAGAGCTATGCTGGGAACAGCATAGCAAGTTGAAATAAGGCTAGTCCGTTATCAACTTGAAAAAGT  
 GGCACCGAGTCGGTGCACAAAGCACCAGTGGTCTAGTGGTAGAATAGTACCCTGCCACGGTACAGACCCGGGTTTCGAT  
 TCCCGGCTGGTGCACTTGTGCAACCAGAAGGTCCGTTTCAGAGCTATGCTGGGAACAGCATAGCAAGTTGAAATAAGGC  
 TAGTCCGTTATCAACTTGAAAAAGTGGCACCGAGTCGGTGCACAAAGCACCAGTGGTCTAGTGGTAGAATAGTACCCT  
 GCCACGGTACAGACCCGGGTTTCGATTCCCGGCTGGTGCAAGAGTGTGGATGGGGTGGAGTTTCAGAGCTATGCTGGGA  
 ACAGCATAGCAAGTTGAAATAAGGCTAGTCCGTTATCAACTTGAAAAAGTGGCACCGAGTCGGTGCACAAAGCACCAG  
 TGGTCTAGTGGTAGAATAGTACCCTGCCACGGTACAGACCCGGGTTTCGATTCCCGGCTGGTGCAATGGTCCATTTACC  
 GCCATGTTTCAGAGCTATGCTGGGAACAGCATAGCAAGTTGAAATAAGGCTAGTCCGTTATCAACTTGAAAAAGTGGCA  
 CCGAGTCGGTGCACAAAGCACCAGTGGTCTAGTGGTAGAATAGTACCCTGCCACGGTACAGACCCGGGTTTCGATTCCC  
 GGCTGGTGCAAGAGGAGTTTCTGGACTACAGTTTCAGAGCTATGCTGGGAACAGCATAGCAAGTTGAAATAAGGCTAGT  
 CCGTTATCAACTTGAAAAAGTGGCACCGAGTCGGTGCATTTTTTTTTT

OsU3 promoter

tRNA Gly

gRNA scaffold (Dang et al., 2015)

PolyT STOP

Target sequences

**Figure S4**

pFH11 construct map and insert sequence.

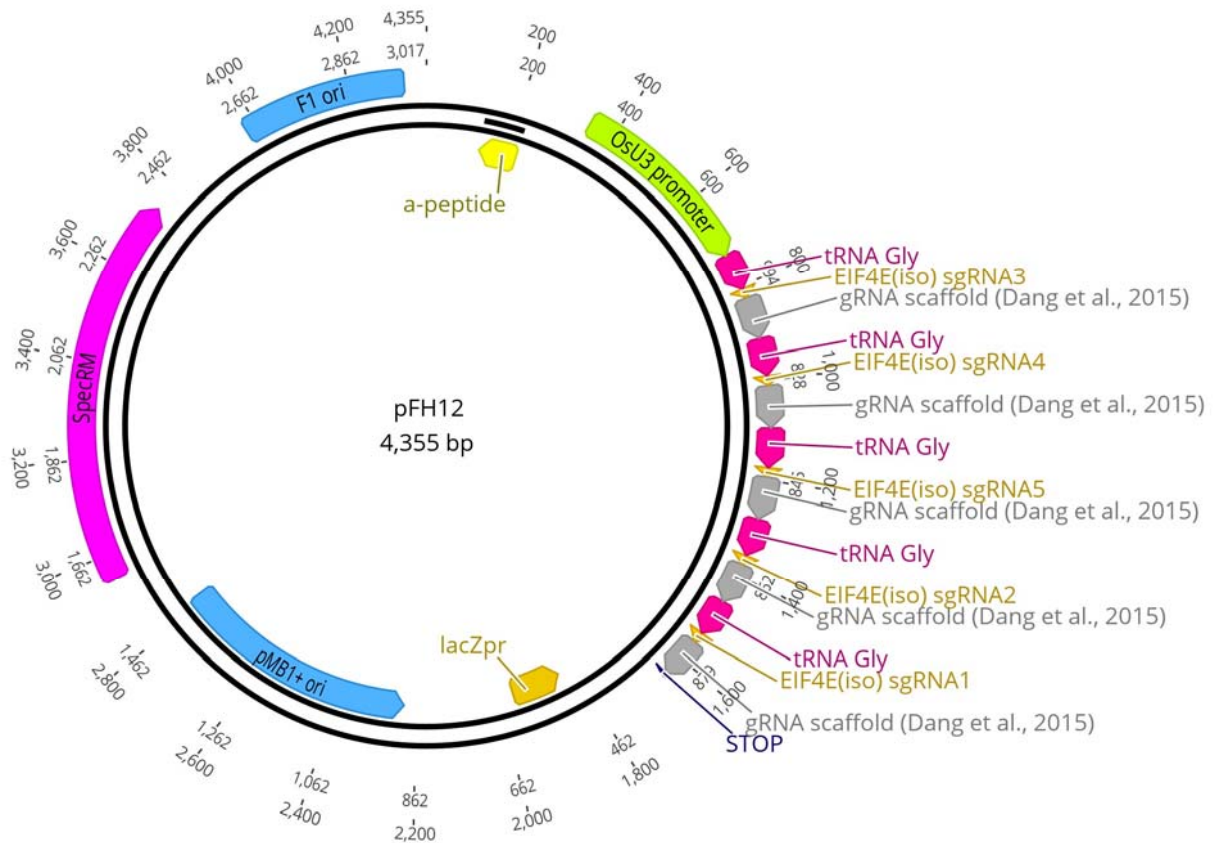

AAGCTTAAGGAATCTTTAAACATACGAACAGATCACTTAAAGTTCTTCTGAAGCAACTTAAAGTTATCAGGCATGCATG  
 GATCTTGGAGGAATCAGATGTGCAGTCAGGGACCATAGCACAAAGACAGGCGTCTTCTACTGGTGCTACCAGCAAATGCT  
 GGAAGCCGGGAACACTGGGTACGTTGGAACACAGTGTATGTGAAGAAGTAAGATAAACTGTAGGAGAAAAGCATTTCGT  
 AGTGGGCCATGAAGCCTTTCAGGACATGTATTGCAGTATGGGCCGGCCATTACGCAATTGGACGACAACAAAGACTAG  
 TATTAGTACCACCTCGGCTATCCACATAGATCAAAGCTGATTTAAAGAGTTGTGCAGATGATCCGTGGCAACAAAGCA  
 CCAGTGGTCTAGTGGTAGAATAGTACCCTGCCACGGTACAGACCCGGGTTTCGATTCCCGGCTGGTGCAAACTCTTCGA  
 CGGTGTGCAAGTTTCAGAGCTATGCTGGGAACAGCATAGCAAGTTGAAATAAGGCTAGTCCGTTATCAACTTGAAAAAGT  
 GGCACCGAGTCGGTGCACAAAGCACCAGTGGTCTAGTGGTAGAATAGTACCCTGCCACGGTACAGACCCGGGTTTCGAT  
 TCCCGGCTGGTGCAAGGCTGGGGTAGAACCAGTGTTCAGAGCTATGCTGGGAACAGCATAGCAAGTTGAAATAAGGC  
 TAGTCCGTTATCAACTTGAAAAAGTGGCACCAGTCGGTGCACAAAGCACCAGTGGTCTAGTGGTAGAATAGTACCCT  
 GCCACGGTACAGACCCGGGTTTCGATTCCCGGCTGGTGCAAGACAGGATAAGCTTTTATTAGTTTCAGAGCTATGCTGGGA  
 ACAGCATAGCAAGTTGAAATAAGGCTAGTCCGTTATCAACTTGAAAAAGTGGCACCAGTCGGTGCACAAAGCACCAG  
 TGGTCTAGTGGTAGAATAGTACCCTGCCACGGTACAGACCCGGGTTTCGATTCCCGGCTGGTGCAAGGCTGCGATGTCGTA  
 CCAGAGTTTCAGAGCTATGCTGGGAACAGCATAGCAAGTTGAAATAAGGCTAGTCCGTTATCAACTTGAAAAAGTGGCA  
 CCGAGTCGGTGCACAAAGCACCAGTGGTCTAGTGGTAGAATAGTACCCTGCCACGGTACAGACCCGGGTTTCGATTCCC  
 GGCTGGTGCAAGGTCGAAGCTGCGCTCCCGGTTTCAGAGCTATGCTGGGAACAGCATAGCAAGTTGAAATAAGGCTAGT  
 CCGTTATCAACTTGAAAAAGTGGCACCAGTCGGTGCATTTTTTTTTT

OsU3 promoter

tRNA Gly

gRNA scaffold (Dang et al., 2015)

PolyT STOP

Target sequences

**Figure S5**

pFH12 construct map and insert sequence.

A

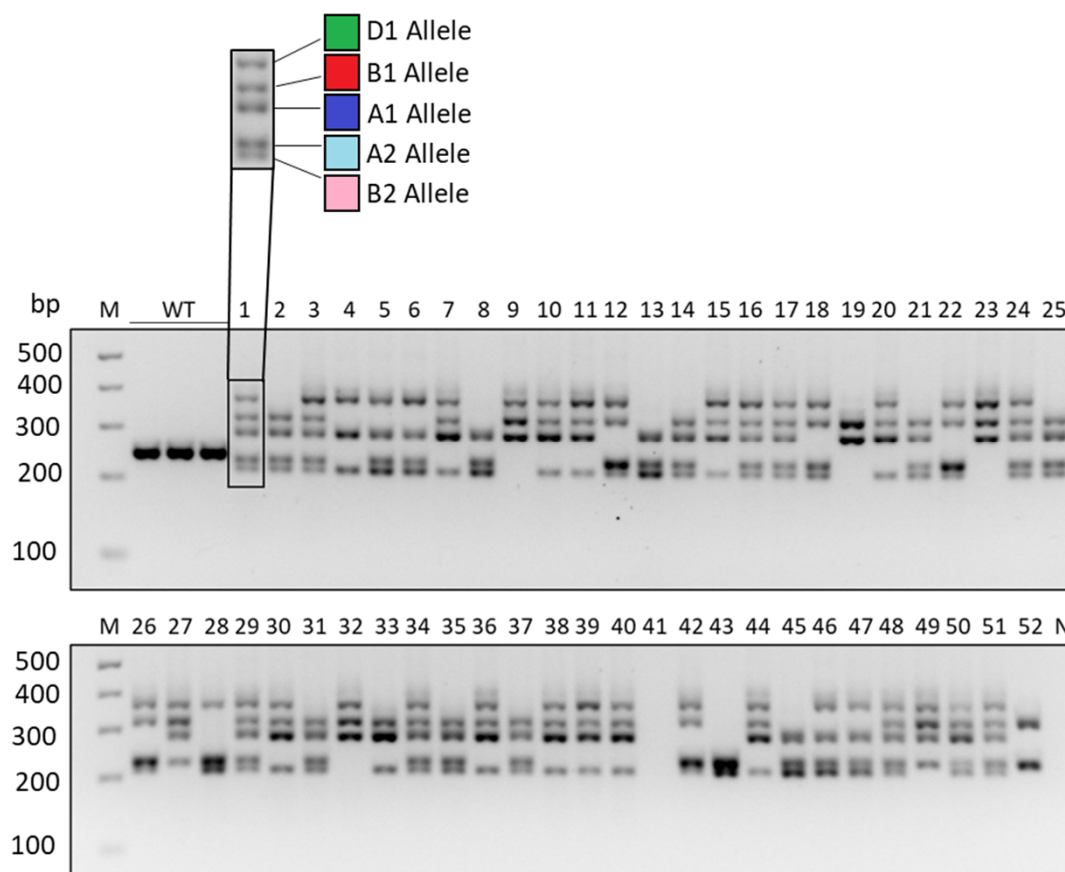

B

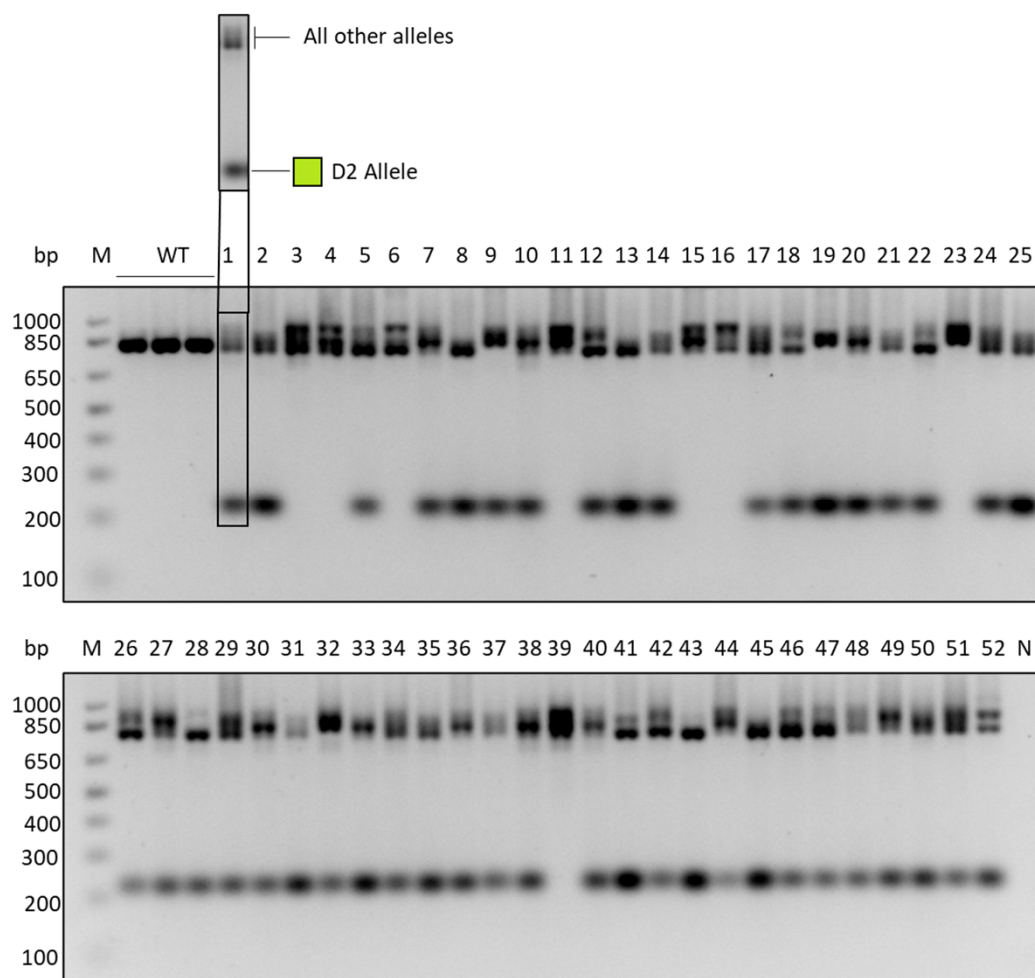**Figure S6**

PCR-genotyping of T1 progeny of *tabak1-2* T0 plant 1 with FH227 + FH228 primers (A) and FH227 + FH230 primers (B).



| T1 plant | A genome | B genome | D genome |
|----------|----------|----------|----------|
| 1        |          |          |          |
| 2        |          |          |          |
| 3        |          |          |          |
| 4        |          |          |          |
| 5        |          |          |          |
| 6        |          |          |          |
| 7        |          |          |          |
| 8        |          |          |          |
| 9        |          |          |          |
| 10       |          |          |          |
| 11       |          |          |          |
| 12       |          |          |          |
| 13       |          |          |          |
| 14       |          |          |          |
| 15       |          |          |          |
| 16       |          |          |          |
| 17       |          |          |          |
| 18       |          |          |          |
| 19       |          |          |          |
| 20       |          |          |          |
| 21       |          |          |          |
| 22       |          |          |          |
| 23       |          |          |          |
| 24       |          |          |          |
| 25       |          |          |          |
| 26       |          |          |          |
| 27       |          |          |          |
| 28       |          |          |          |
| 29       |          |          |          |
| 30       |          |          |          |
| 31       |          |          |          |
| 32       |          |          |          |
| 33       |          |          |          |
| 34       |          |          |          |
| 35       |          |          |          |
| 36       |          |          |          |
| 37       |          |          |          |
| 38       |          |          |          |
| 39       |          |          |          |
| 40       |          |          |          |
| 41       | nd       | nd       | nd       |
| 42       |          |          |          |
| 43       |          |          |          |
| 44       |          |          |          |
| 45       |          |          |          |
| 46       |          |          |          |
| 47       |          |          |          |
| 48       |          |          |          |
| 49       |          |          |          |
| 50       |          |          |          |
| 51       |          |          |          |
| 52       |          |          |          |

**Figure S7**

*TaBAK1-2* allele distribution among T1 progeny of *tabak1-2* T0 plant 1.



|                  |     |                                                               |     |
|------------------|-----|---------------------------------------------------------------|-----|
| TaBAK1-2_A(WT)   | 1   | MAASPEMLRRCWAAAAVLSAVLTVSRVSANTEGDALYSRLQSLKDANNVLQSWDPTLVN   | 60  |
| TaBAK1-2_T0-1_A1 | 1   | MAASPEMLRRCWAAAAVLSAVLTVSRVSANTEGDALYSRLQSLKDANNVLQSWDPTLVN   | 60  |
| TaBAK1-2_A(WT)   | 61  | PCTWFHVTCNTDNSVIRVDLGNAQLSGALVSQLGQLKNLQYLELYSNNISGTIPLELGN-  | 119 |
| TaBAK1-2_T0-1_A1 | 61  | PCTWFHVTCNTDNSVIRVDLGNAQLSGALVSQLGQLKNLQYLELYSNNISGTIPLR+RQS* | 120 |
| TaBAK1-2_A(WT)   | 120 | -LTNLVSLDLYLNKFTGGIPDTLGKLLKLRFLRLNNSLSGQIPQS-----LTNISTLQ    | 172 |
| TaBAK1-2_T0-1_A1 | 121 | VLGCRKAGG*TRELDKPGQFGSVPEQIHWRYSRHIGETLKVAIPPS*QQQSFWSNSTILQ  | 180 |
| TaBAK1-2_A(WT)   | 173 | VLDLSNNNLSGAVPSTGFSFLFTPISFGNNPNLCGPGTTKPCPGAPPFSPPPFPNPPTPP  | 232 |
| TaBAK1-2_T0-1_A1 | 181 | VLDLSNNNLSGAVPSTGFSFLFTPISFGNNPNLCGPGTTKPCPGAPPFSPPPFPNPPTPP  | 240 |
| TaBAK1-2_A(WT)   | 233 | AAQGDPKTGAIAGGVAAGAALIFAVPAIGFALWRRRKPEEHFFDVPAAEDPEVHLGQLKR  | 292 |
| TaBAK1-2_T0-1_A1 | 241 | AAQGDPKTGAIAGGVAAGAALIFAVPAIGFALWRRRKPEEHFFDVPAAEDPEVHLGQLKR  | 300 |
| TaBAK1-2_A(WT)   | 293 | FSLRELQVASDNFSNKNILGRGGFGKVKYGRITDGTLVAVKRLKEERTPGGELQFQTEVE  | 352 |
| TaBAK1-2_T0-1_A1 | 301 | FSLRELQVASDNFSNKNILGRGGFGKVKYGRITDGTLVAVKRLKEERTPGGELQFQTEVE  | 360 |
| TaBAK1-2_A(WT)   | 353 | MISMAVHRNLLRLRGFCMTPTERLLVYPYMANGSVASRLRERGPNEPALEWEKRTRIALG  | 412 |
| TaBAK1-2_T0-1_A1 | 361 | MISMAVHRNLLRLRGFCMTPTERLLVYPYMANGSVASRLRERGPNEPALEWEKRTRIALG  | 420 |
| TaBAK1-2_A(WT)   | 413 | SARGLSYLHDHCDPKIIHRDVKAANILLDEDFEAVVGDFGLAKLMDYKDTHTVTTAVRGTI | 472 |
| TaBAK1-2_T0-1_A1 | 421 | SARGLSYLHDHCDPKIIHRDVKAANILLDEDFEAVVGDFGLAKLMDYKDTHTVTTAVRGTI | 480 |
| TaBAK1-2_A(WT)   | 473 | GHIAPPEYLSTGKSSEKTDVFGYGIMLLELITGQRAFDLARLANDDDVMLLDWVKGLLKEK | 532 |
| TaBAK1-2_T0-1_A1 | 481 | GHIAPPEYLSTGKSSEKTDVFGYGIMLLELITGQRAFDLARLANDDDVMLLDWVKGLLKEK | 540 |
| TaBAK1-2_A(WT)   | 533 | KVEMLVDPDLQSVYVEHEVEALIQVALLCTQGSPMDRPMSEVVRMLEGDGLAERWEEWQ   | 592 |
| TaBAK1-2_T0-1_A1 | 541 | KVEMLVDPDLQSVYVEHEVEALIQVALLCTQGSPMDRPMSEVVRMLEGDGLAERWEEWQ   | 600 |
| TaBAK1-2_A(WT)   | 593 | KVEVVRQEAEELAPRNNDWIVDSTYNLRAVELSGPR-                         | 627 |
| TaBAK1-2_T0-1_A1 | 601 | KVEVVRQEAEELAPRNNDWIVDSTYNLRAVELSGPR*                         | 636 |

**Figure S8**

Protein alignment of the *tabak1-2* T0 plant 1 A1 allele to the WT.

|                  |     |                                                               |     |
|------------------|-----|---------------------------------------------------------------|-----|
| TaBAK1-2_A(WT)   | 1   | MAASPEMLRRCWAAAAVLSAVLTVSRVSANTEGDALYSRLQSLKDANNVLQSWDPTLVN   | 60  |
| TaBAK1-2_T0-1_A2 | 1   | MAASPEMLRRCWAAAAVLSAVLTVSRVSANTEGDALYSRLQSLKDANNVLQSWDPTLVN   | 60  |
| TaBAK1-2_A(WT)   | 61  | PCTWFHVTCNTDNSVIRVDLGNALSGALVSQLGQLKNLQYLELYSNNISGTIPLELGNL   | 120 |
| TaBAK1-2_T0-1_A2 | 61  | PCTWFHVTCNTDNSVIRVDLGNALSGALVSQLGQLKNLQYLELYSN I ELGNL        | 116 |
| TaBAK1-2_A(WT)   | 121 | TNLVSLDLYLKFTGGIPDTLGKLLKLRFLRLNNSLSGQIPQSLTNISTLQVLDLSNNN    | 180 |
| TaBAK1-2_T0-1_A2 | 117 | TNLVSLDLYLKFTGGIPDTLGKLLKLRFLRLNNSLSGQIPQSLT +VLDLSNNN        | 172 |
| TaBAK1-2_A(WT)   | 181 | LSGAVPSTGSFSLFTPIISFGNNPNLCGPGTTKPCPGAPPFSPPPPFNPTPPAAQGDPKT  | 240 |
| TaBAK1-2_T0-1_A2 | 173 | LSGAVPSTGSFSLFTPIISFGNNPNLCGPGTTKPCPGAPPFSPPPPFNPTPPAAQGDPKT  | 232 |
| TaBAK1-2_A(WT)   | 241 | GAIAGGVAAGAALIFAVPAIGFALWRRRKPEEHFFDVPAAEDPEVHLGQLKRFSRLRELQV | 300 |
| TaBAK1-2_T0-1_A2 | 233 | GAIAGGVAAGAALIFAVPAIGFALWRRRKPEEHFFDVPAAEDPEVHLGQLKRFSRLRELQV | 292 |
| TaBAK1-2_A(WT)   | 301 | ASDNFSNKNILGRGGFGKVYKGRITDGTLLVAVKRLKEERTPGGELQFQTEVEMISMAVHR | 360 |
| TaBAK1-2_T0-1_A2 | 293 | ASDNFSNKNILGRGGFGKVYKGRITDGTLLVAVKRLKEERTPGGELQFQTEVEMISMAVHR | 352 |
| TaBAK1-2_A(WT)   | 361 | NLLRLRGFCMTPTERLLVYPYMANGSVASRLRERGPNEPALEWEKRTRIALGSARGLSYL  | 420 |
| TaBAK1-2_T0-1_A2 | 353 | NLLRLRGFCMTPTERLLVYPYMANGSVASRLRERGPNEPALEWEKRTRIALGSARGLSYL  | 412 |
| TaBAK1-2_A(WT)   | 421 | HDHCDPKIIHRDVKAANILLDEDFEAVVGDFGLAKLMDYKDTHVTTAVRGTIGHIAPEYL  | 480 |
| TaBAK1-2_T0-1_A2 | 413 | HDHCDPKIIHRDVKAANILLDEDFEAVVGDFGLAKLMDYKDTHVTTAVRGTIGHIAPEYL  | 472 |
| TaBAK1-2_A(WT)   | 481 | STGKSSEKTDVFGYGIMLLELITGQRAFDLARLANDDDVMLLDWVKGLLKEKKVEMLVDP  | 540 |
| TaBAK1-2_T0-1_A2 | 473 | STGKSSEKTDVFGYGIMLLELITGQRAFDLARLANDDDVMLLDWVKGLLKEKKVEMLVDP  | 532 |
| TaBAK1-2_A(WT)   | 541 | DLQSVYVEHEVEALIQVALLCTQGSPMDRPKMSEVVRMLEGDGLAERWEEWQKVEVVRQE  | 600 |
| TaBAK1-2_T0-1_A2 | 533 | DLQSVYVEHEVEALIQVALLCTQGSPMDRPKMSEVVRMLEGDGLAERWEEWQKVEVVRQE  | 592 |
| TaBAK1-2_A(WT)   | 601 | AELAPRNNDWIVDSTYNLRAVELSGPR                                   | 627 |
| TaBAK1-2_T0-1_A2 | 593 | AELAPRNNDWIVDSTYNLRAVELSGPR                                   | 619 |

**Figure S9**

Protein alignment of the *tabak1-2* T0 plant 1 A2 allele to the WT.

|                  |     |                                                               |     |
|------------------|-----|---------------------------------------------------------------|-----|
| TaBAK1-2_B(WT)   | 1   | MAASPEMLRRRWAAVAVLSVVLAVSRVAANTEGDALYSRLQSLKDANNVLSWDPTLVN    | 60  |
| TaBAK1-2_T0-1_B1 | 1   | MAASPEMLRRRWAAVAVLSVVLAVSRVAANTEGDALYSRLQSLKDANNVLSWDPTLVN    | 60  |
| TaBAK1-2_B(WT)   | 61  | PCTWFHVTCNTDNSVIRVDLGNALSGALVSQGLQKLNQYLELYSNNISGTIPLELG--    | 118 |
| TaBAK1-2_T0-1_B1 | 61  | PCTWFHVTCNTDNSVIRVDLGNALSGALVSQGLQKLNQYLELYSNNISGTIPL L       | 120 |
| TaBAK1-2_B(WT)   | 119 | -----NLTNLVSLDLYLNKFTGGIPDTLGQLLKLRLRLNN                      | 154 |
| TaBAK1-2_T0-1_B1 | 121 | HTHTTRSPPNPPVGTSSASRYAALGNLTNLVSLDLYLNKFTGGIPDTLGQLLKLRLRLNN  | 180 |
| TaBAK1-2_B(WT)   | 155 | NSLSGQIPQSLTNISTLQVLDLSNNNLSGAVPSTGSFSLFTPISFGNNPNLCGPGTSKPC  | 214 |
| TaBAK1-2_T0-1_B1 | 181 | NSLSGQIPQSLTNISTLQVLDLSNNNLSGAVPSTGSFSLFTPISFGNNPNLCGPGTSKPC  | 240 |
| TaBAK1-2_B(WT)   | 215 | PGAPPFSPPPFPNPPTPPTTPGDPKGTGAIAGGVAAGAALIFAVPAIGFALWRRRKPEEHF | 274 |
| TaBAK1-2_T0-1_B1 | 241 | PGAPPFSPPPFPNPPTPPTTPGDPKGTGAIAGGVAAGAALIFAVPAIGFALWRRRKPEEHF | 300 |
| TaBAK1-2_B(WT)   | 275 | FDVPAEEDPEVHLGQLKRFSLRELQVASDNFSNKNILGRGGFGKVYKGRLLDGTTLVAVKR | 334 |
| TaBAK1-2_T0-1_B1 | 301 | FDVPAEEDPEVHLGQLKRFSLRELQVASDNFSNKNILGRGGFGKVYKGRLLDGTTLVAVKR | 360 |
| TaBAK1-2_B(WT)   | 335 | LKEERTPGGELQFQTEVEMISMAVHRNLLRLRGFCMTPTERLLVYPYMANGSVASRLRER  | 394 |
| TaBAK1-2_T0-1_B1 | 361 | LKEERTPGGELQFQTEVEMISMAVHRNLLRLRGFCMTPTERLLVYPYMANGSVASRLRER  | 420 |
| TaBAK1-2_B(WT)   | 395 | GPNEPALEWEKRTRIALGSARGLSYLHDHCDPKIIHRDVKAANILLDEDFEAVVGDFGLA  | 454 |
| TaBAK1-2_T0-1_B1 | 421 | GPNEPALEWEKRTRIALGSARGLSYLHDHCDPKIIHRDVKAANILLDEDFEAVVGDFGLA  | 480 |
| TaBAK1-2_B(WT)   | 455 | KLMDYKDTHTVTTAVRGITIGHIAPEYLSGKSSEKTDVFGYGIMLLELITGQRAFDLARLA | 514 |
| TaBAK1-2_T0-1_B1 | 481 | KLMDYKDTHTVTTAVRGITIGHIAPEYLSGKSSEKTDVFGYGIMLLELITGQRAFDLARLA | 540 |
| TaBAK1-2_B(WT)   | 515 | NDDDVMLLDWVKGLLKEKKVEMLVDPDLQSVYVEHEVEALIQVALLCTQGSPMDRPMSE   | 574 |
| TaBAK1-2_T0-1_B1 | 541 | NDDDVMLLDWVKGLLKEKKVEMLVDPDLQSVYVEHEVEALIQVALLCTQGSPMDRPMSE   | 600 |
| TaBAK1-2_B(WT)   | 575 | VVRMLEGDGLAERWEEWQKVEVVRQEAELAPRNNDWIVDSTYNLRAVELSGPR         | 627 |
| TaBAK1-2_T0-1_B1 | 601 | VVRMLEGDGLAERWEEWQKVEVVRQEAELAPRNNDWIVDSTYNLRAVELSGPR         | 653 |

**Figure S10**

Protein alignment of the *tabak1-2* T0 plant 1 B1 allele to the WT.

|                  |     |                                                                |     |
|------------------|-----|----------------------------------------------------------------|-----|
| TaBAK1-2_B(WT)   | 1   | MAASPEMLRRRWAAVAVLSVVLAVSRVAANTEGDALYSRLRQSLKDANNVLQSWDPTLVN   | 60  |
| TaBAK1-2_T0-1_B2 | 1   | MAASPEMLRRRWAAVAVLSVVLAVSRVAANTEGDALYSRLRQSLKDANNVLQSWDPTLVN   | 60  |
| TaBAK1-2_B(WT)   | 61  | PCTWFHVTCNTDNSVIRVDLGNAQLSGALVSQLGQLKNLQYLELYSNNISGTIPLELGNL   | 120 |
| TaBAK1-2_T0-1_B2 | 61  | PCTWFHVTCNTDNSVIRVDLGNAQLSGALVSQLGQLKNLQYLELYSNNISGTN-----     | 113 |
| TaBAK1-2_B(WT)   | 121 | TNLVSLDLYLNKFTGGIPDTLGQLLKLRLFLRLNNSLSGQIPQSLTNISTLQVLDLSNNN   | 180 |
| TaBAK1-2_T0-1_B2 | 114 | --LVSLDLYLNKFTGGIPDTLGQLLKLRLFLRLNNSLSGQIPQSLT--NTLQVLDLSNNN   | 169 |
| TaBAK1-2_B(WT)   | 181 | LSGAVPSTGSFSLFTPISFGNNPNLCGPGTSKPCPGAPPFSPPPFPNPPTPTTPGDPKT    | 240 |
| TaBAK1-2_T0-1_B2 | 170 | LSGAVPSTGSFSLFTPISFGNNPNLCGPGTSKPCPGAPPFSPPPFPNPPTPTTPGDPKT    | 229 |
| TaBAK1-2_B(WT)   | 241 | GAIAGGVAAGAALIFAVPAIGFALWRRRKPEEHFFDVPAAEDPEVHLGQLKRFSRLRELQV  | 300 |
| TaBAK1-2_T0-1_B2 | 230 | GAIAGGVAAGAALIFAVPAIGFALWRRRKPEEHFFDVPAAEDPEVHLGQLKRFSRLRELQV  | 289 |
| TaBAK1-2_B(WT)   | 301 | ASDNFSNKNILGRGGFGKVYKGRLTDGTLVAVKRLKEERTPGGELQFQTEVEMISMAVHR   | 360 |
| TaBAK1-2_T0-1_B2 | 290 | ASDNFSNKNILGRGGFGKVYKGRLTDGTLVAVKRLKEERTPGGELQFQTEVEMISMAVHR   | 349 |
| TaBAK1-2_B(WT)   | 361 | NLLRLRGFCMTPTERLLVYPYMANGSVASRLRERGNPALEWEKRTTRIALGSARGLSYL    | 420 |
| TaBAK1-2_T0-1_B2 | 350 | NLLRLRGFCMTPTERLLVYPYMANGSVASRLRERGNPALEWEKRTTRIALGSARGLSYL    | 409 |
| TaBAK1-2_B(WT)   | 421 | HDHCDPKIIHRDVKAANILLDEDFEAVVGDFGLAKLMDYKDTHTVTTAVRGTTIGHIAPEYL | 480 |
| TaBAK1-2_T0-1_B2 | 410 | HDHCDPKIIHRDVKAANILLDEDFEAVVGDFGLAKLMDYKDTHTVTTAVRGTTIGHIAPEYL | 469 |
| TaBAK1-2_B(WT)   | 481 | STGKSSEKTDVFGYGIMLLELITGQRAFDLARLANDDDVMLLDWVKGLLKEKKVEMLVDP   | 540 |
| TaBAK1-2_T0-1_B2 | 470 | STGKSSEKTDVFGYGIMLLELITGQRAFDLARLANDDDVMLLDWVKGLLKEKKVEMLVDP   | 529 |
| TaBAK1-2_B(WT)   | 541 | DLQSVYVEHEVEALIQVALLCTQGSPMDRPMSEVVRMLEGDGLAERWEEWQKVEVVRQE    | 600 |
| TaBAK1-2_T0-1_B2 | 530 | DLQSVYVEHEVEALIQVALLCTQGSPMDRPMSEVVRMLEGDGLAERWEEWQKVEVVRQE    | 589 |
| TaBAK1-2_B(WT)   | 601 | AELAPRNNDWIVDSTYNLRAVELSGPR                                    | 627 |
| TaBAK1-2_T0-1_B2 | 590 | AELAPRNNDWIVDSTYNLRAVELSGPR                                    | 616 |

**Figure S11**

Protein alignment of the *tabak1-2* T0 plant 1 B2 allele to the WT.

|                  |     |                                                                 |     |
|------------------|-----|-----------------------------------------------------------------|-----|
| TaBAK1-2_D(WT)   | 1   | MAASPEMLRRRWAAAAVLSVVLAVSRVSANTEGDALYSRLQSLKDANNVLQSWDPTLVN     | 60  |
| TaBAK1-2_T0-1_D1 | 1   | MAASPEMLRRRWAAAAVLSVVLAVSRVSANTEGDALYSRLQSLKDANNVLQSWDPTLVN     | 60  |
| TaBAK1-2_D(WT)   | 61  | PCTWFHVTCTDNSVIRVDLGNALVSGALVSQLGQLKNLQYLELYSNNISGTIPLELGNL     | 120 |
| TaBAK1-2_T0-1_D1 | 61  | PCTWFHVTCTDNSVIRVDLGNALVSGALVSQLGQLKNLQYLELYSNNISGTIPL+ G L     | 120 |
| TaBAK1-2_D(WT)   | 121 | TNLVSLDLYLNKFTGGIPDTLGQLLKLRLRLNNSLSG-----                      | 159 |
| TaBAK1-2_T0-1_D1 | 121 | *ENRVL*LCGDKRR*GSLQRLAGNVPRLAQDH*G*RLPR*RT*QTWSVWICT*TNLAVF     | 180 |
| TaBAK1-2_D(WT)   | 160 | -----QIPQSLTNISTLQVLDLSNNNLSGAVPSTGSFSLFTPI                     | 197 |
| TaBAK1-2_T0-1_D1 | 181 | QTHWGN*SCDSSVLT*TTT*VFLVKFHN*PILAPSKFWIYQTTISLERFHLARFHSPL*     | 240 |
| TaBAK1-2_D(WT)   | 198 | SFGNNPNLCGPGTTKPCPGAPPFSPPPFPNPPTPPAAQGDPKTGAIAGGVAAGAALIFAV    | 257 |
| TaBAK1-2_T0-1_D1 | 241 | VLVIIQIFVARVLRNHVGLHLLFLHLHHSILQHHPRHKVTLKPEQLLEVLRLVH*YLLF     | 300 |
| TaBAK1-2_D(WT)   | 258 | PAIGFALWRRRKPEEHFFDVPAAEDPEVHLGQLKRFSRLQVADNFSNKNILGRGGFG       | 317 |
| TaBAK1-2_T0-1_D1 | 301 | LQLDLHCGGDVNLK*ISLMSLLRRIQKCTLAS*RGSH*GSFKLLAITS*AIRTF*EEVALE   | 360 |
| TaBAK1-2_D(WT)   | 318 | KVYKGRLTDGTLVAVKRLKEERTPGGELQFQTEVEMISMAVHRNLLRLRGFCMTPTERLL    | 377 |
| TaBAK1-2_T0-1_D1 | 361 | RCTRGD*RMVHW*QLKD*KKNVLLVANSNSKQKSK*LVWQCIGTCFDSVDSA*HLQNGY*    | 420 |
| TaBAK1-2_D(WT)   | 378 | VYPYMANGSVASRLRERGPNEPALEWEKRTIALGSARGLSYLHDHCDPKIIHRDVKAAN     | 437 |
| TaBAK1-2_T0-1_D1 | 421 | SIHTWLTVALHHVCESEGQMSRLNLNGKKEGLHWDLPEDCLTCMITVIPRSFIVMSKPQT    | 480 |
| TaBAK1-2_D(WT)   | 438 | ILLDEDFEAVVGDFGLAKLMDYKDTHTVTTAVRGITIGHIAPEYLS*TKGSSEKTDVFGYGIM | 497 |
| TaBAK1-2_T0-1_D1 | 481 | FSWMKTLRRLWVTL*DWPSLWTT*RTL*PQPSVERSGILLPSTYPPE*SPRRRMFSVTASC   | 540 |
| TaBAK1-2_D(WT)   | 498 | LLELITGQRAFDLARLANDDVMLLDWVKGLLKEKKVEMLVDPDLQSVYVEHEVEALIQV     | 557 |
| TaBAK1-2_T0-1_D1 | 541 | FWSLSLGRGHSTSHVLQTTTMS*CLTG*KGC*KRRRWRCWWTRTCRACTWSTRWRR*SRW    | 600 |
| TaBAK1-2_D(WT)   | 558 | ALLCTQGS*PMDR*PKMSEVVRMLEGDGLAERWEEWQKVEVVRQEAELAPRNNDWIVDSTYN  | 617 |
| TaBAK1-2_T0-1_D1 | 601 | RCCARRGRRWTGPRCRRW*GCWRATGWSAGRSGRRRWWSGRRRSWPRETTTGSSTPPTT     | 660 |
| TaBAK1-2_D(WT)   | 618 | LRAVELSGPR                                                      | 627 |
| TaBAK1-2_T0-1_D1 | 661 | SGRWSSPARG                                                      | 670 |

**Figure S12**

Protein alignment of the *tabak1-2* T0 plant 1 D1 allele to the WT.

|                  |     |                                                                |     |
|------------------|-----|----------------------------------------------------------------|-----|
| TaBAK1-2_D(WT)   | 1   | MAASPEMLRRRWAAAAVLSVVLAVSRVSANTEGDALYSRLRQSLKDANNVLQSWDPTLVN   | 60  |
| TaBAK1-2_T0-1_D2 | 1   | MAASPEMLRRRWAAAAVLSVVLAVSRVSANTEGDALYSRLRQSLKDANNVLQSWDPTLVN   | 60  |
| TaBAK1-2_D(WT)   | 61  | PCTWFHVTCNTDNSVIRVDLGNAQLSGALVSQLGQLKNLQYLELYSNNISGTIPLELGNL   | 120 |
| TaBAK1-2_T0-1_D2 | 61  | PCTWFHVTCNTDNSVIRVDLGNAQLSGALVSQLGQLKNLQYLELYSNNISGTIPLPSKFW   | 120 |
| TaBAK1-2_D(WT)   | 121 | TNLVSLDLYLNKFTGGIPDTLGQLLKLRLFLRLNNSLSGQIPQSLTNISTLQVLDLSNNN   | 180 |
| TaBAK1-2_T0-1_D2 | 121 | IYQTTISLERFHQLARFHSLPL*VLVIIQIFVARVLNRHVLGHLFLHLHHSILQHHPRH    | 180 |
| TaBAK1-2_D(WT)   | 181 | LSGAVPSTGSFSLFTPISFGNNPNLCGPGTTKPCPGAPPFSPPPFPNPPTPPAAQGDPKT   | 240 |
| TaBAK1-2_T0-1_D2 | 181 | KVTLKPEQLLEVLRLVLH*-----                                       | 199 |
| TaBAK1-2_D(WT)   | 241 | GAIAGGVAAGAALIFAVPAIGFALWRRRKPEEHFFDVPAEEDPEVHLGQLKRFSRELQV    | 300 |
| TaBAK1-2_T0-1_D2 | 200 | -----YLLFLQLDLHCGGDVNLKSISLSMLLRIQKCTLAS*RGSH*GSFKL            | 246 |
| TaBAK1-2_D(WT)   | 301 | ASDNFSNKNILGRGGFGKVYKGRLTDGTLVAVKRLKEERTPGGELQFQTEVEMISMAVHR   | 360 |
| TaBAK1-2_T0-1_D2 | 247 | LAITSAIRTF*EEVALERCTRGD*RMVHW*QLKD*KKNVLLVANSNSKQKSK*LVWQCIG   | 306 |
| TaBAK1-2_D(WT)   | 361 | NLLRLRGFCMTPTERLLVYPYMANGSVASRLRERGPNEPALEWEKRTRIALGSARGLSYL   | 420 |
| TaBAK1-2_T0-1_D2 | 307 | TCFDSVDSA*HLQNGY*SIHTWLTVALHHVCESEGQMSRLNGKELGLHWDLPEDCLTC     | 366 |
| TaBAK1-2_D(WT)   | 421 | HDHCDPKIIHRDVKAANILLDEDFEAVVGDFGLAKLMDYKDTHTVTTAVRGITIGHIAPEYL | 480 |
| TaBAK1-2_T0-1_D2 | 367 | MITVIPRSFIVMSKPQTFSWMKTLRRLWVTLDWPSLWTTRTLMT*PQPSVERSGILLPSTY  | 426 |
| TaBAK1-2_D(WT)   | 481 | STGKSSEKTDVFGYGIMLLELITGQRAFDLARLANDDDVMLLDWVKGLLKEKKVEMLVDP   | 540 |
| TaBAK1-2_T0-1_D2 | 427 | PPESPPrRRMFsvTASCFWslSLGRGHSTshVLQTTMTSCCLTG*KGC*KRRRWRCWWTR   | 486 |
| TaBAK1-2_D(WT)   | 541 | DLQSVYVEHEVEALIQVALLCTQGSPMDRPMSEVVRMLEGDGLAERWEEWQKVEVVRQE    | 600 |
| TaBAK1-2_T0-1_D2 | 487 | TCRACTWSTRWRR*SRWRCCARRGRRTGPRCRRW*GCWRATGWRsAGRSgRRWRWSgRR    | 546 |
| TaBAK1-2_D(WT)   | 601 | AELAPRNNDWIVDSTYNLRAVELSGPR                                    | 627 |
| TaBAK1-2_T0-1_D2 | 547 | RSWPRETTTGSSTPPTTSGRWSSPARG                                    | 573 |

**Figure S13**

Protein alignment of the *tabak1-2* T0 plant 1 D2 allele to the WT.

|                 |     |                                                               |     |
|-----------------|-----|---------------------------------------------------------------|-----|
| TaBAK1-2_A(WT)  | 1   | MAASPEMLRRCWAAAAVLSAVLTVSRVSANTEGDALYSRLRQSLKDANNVLQSWDPTLVN  | 60  |
| BAK1-2A_T0-2_A1 | 1   | MAASPEMLRRCWAAAAVLSAVLTVSRVSANTEGDALYSRLRQSLKDANNVLQSWDPTLVN  | 60  |
| TaBAK1-2_A(WT)  | 61  | PCTWFHVTCNTDNSVIRVDLGNAQLSGALVSQLGQLKNLQYLELYSNNISGTIPLELGNL  | 120 |
| BAK1-2A_T0-2_A1 | 61  | PCTWFHVTCNTDNSVIRVDLGNAQLSGALVSQLGQLKNLQYLELYSNNISGTIPL       | 117 |
| TaBAK1-2_A(WT)  | 121 | TNLVSLDLYLNKFTGGIPDTLGKLLKLRFLRLNNSLSGQIPQSLTNISTLQVLDLSNNN   | 180 |
| BAK1-2A_T0-2_A1 | 118 | -----TLQVLDLSNNN                                              | 128 |
| TaBAK1-2_A(WT)  | 181 | LSGAVPSTGSFSLFTPISFGNNPNLCGPGTTKPCPGAPPFSPPPFPNPTPPAAQGDPKT   | 240 |
| BAK1-2A_T0-2_A1 | 129 | LSGAVPSTGSFSLFTPISFGNNPNLCGPGTTKPCPGAPPFSPPPFPNPTPPAAQGDPKT   | 188 |
| TaBAK1-2_A(WT)  | 241 | GAIAGGVAAGAALIFAVPAIGFALWRRRKPEEHFFDVPAAEDPEVHLGQLKRFSRLRELQV | 300 |
| BAK1-2A_T0-2_A1 | 189 | GAIAGGVAAGAALIFAVPAIGFALWRRRKPEEHFFDVPAAEDPEVHLGQLKRFSRLRELQV | 248 |
| TaBAK1-2_A(WT)  | 301 | ASDNFSNKNILGRGGFGKVKGRLLTDGTLVAVKRLKEERTPGGELQFQTEVEMISMAVHR  | 360 |
| BAK1-2A_T0-2_A1 | 249 | ASDNFSNKNILGRGGFGKVKGRLLTDGTLVAVKRLKEERTPGGELQFQTEVEMISMAVHR  | 308 |
| TaBAK1-2_A(WT)  | 361 | NLLRLRGFCMTPTERLLVYPYMANGSVASRLRERGPNEPALEWEKRTRIALGSARGLSYL  | 420 |
| BAK1-2A_T0-2_A1 | 309 | NLLRLRGFCMTPTERLLVYPYMANGSVASRLRERGPNEPALEWEKRTRIALGSARGLSYL  | 368 |
| TaBAK1-2_A(WT)  | 421 | HDHCDPKIIHRDVKAANILLDEDFEAVVGDFGLAKLMDYKDHVTTAVRGTIGHIAPEYL   | 480 |
| BAK1-2A_T0-2_A1 | 369 | HDHCDPKIIHRDVKAANILLDEDFEAVVGDFGLAKLMDYKDHVTTAVRGTIGHIAPEYL   | 428 |
| TaBAK1-2_A(WT)  | 481 | STGKSSEKTDVFGYGIMLLELITQRAFDLARLANDDDVMLLDWVKGLLKEKKVEMLVDP   | 540 |
| BAK1-2A_T0-2_A1 | 429 | STGKSSEKTDVFGYGIMLLELITQRAFDLARLANDDDVMLLDWVKGLLKEKKVEMLVDP   | 488 |
| TaBAK1-2_A(WT)  | 541 | DLQSVYVEHEVEALIQVALLCTQGSPMDRPMSEVVRMLEGDGLAERWEEWQKVEVVRQE   | 600 |
| BAK1-2A_T0-2_A1 | 489 | DLQSVYVEHEVEALIQVALLCTQGSPMDRPMSEVVRMLEGDGLAERWEEWQKVEVVRQE   | 548 |
| TaBAK1-2_A(WT)  | 601 | AELAPRNNDWIVDSTYNLRAVELSGPR                                   | 627 |
| BAK1-2A_T0-2_A1 | 549 | AELAPRNNDWIVDSTYNLRAVELSGPR                                   | 575 |

**Figure S14**

Protein alignment of the *tabak1-2* T0 plant 2 A1 allele to the WT.



|                  |     |                                                                 |     |
|------------------|-----|-----------------------------------------------------------------|-----|
| TaBAK1-2_D(WT)   | 1   | MAASPEMLRRRWAAAAVLSVVLAVSRVSANTEGDALYSRLRQSLKDANNVLQSWDPTLVN    | 60  |
| TaBAK1-2_T0-2_D1 | 1   | MAASPEMLRRRWAAAAVLSVVLAVSRVSANTEGDALYSRLRQSLKDANNVLQSWDPTLVN    | 60  |
| TaBAK1-2_D(WT)   | 61  | PCTWFHVTCNTDNSVIRVDLGNAQLSGALVSQLGQLKNLQYLELYSNNISGTIPLELGNL    | 120 |
| TaBAK1-2_T0-2_D1 | 61  | PCTWFHVTCNTDNSVIRVDLGNAQLSGALVSQLGQLKNLQYLELYSNNISGTIPLSG-T*    | 119 |
| TaBAK1-2_D(WT)   | 121 | TNLVSLDLYLNKFTGGIPDTLGQLLKLRLFLRLNNSLSGQIPQSLTNISTLQVLDLSNNN    | 180 |
| TaBAK1-2_T0-2_D1 | 120 | QTWSVWICT*TNLAVFQTHWGN*SCDSSVLT*TTVFLVKFHN*PILAPSKFWIYQTTI      | 179 |
| TaBAK1-2_D(WT)   | 181 | LSGAVPSTGSFSLFTPISFGNPNLCPGPTTKPCPGAPPFSPPPFPNPPTPPAAQGDPKT     | 240 |
| TaBAK1-2_T0-2_D1 | 180 | SLERFQHQLARFHSPL*VLVIIQIFVARVLRNHVLGHLFLHLHHSILQHHPRHKVTLKP     | 239 |
| TaBAK1-2_D(WT)   | 241 | GAIAGGVAAGAALIFAVPAIGFALWRRRKPEEHFFDVPAAEDPEVHLGQLKRFSLRELQV    | 300 |
| TaBAK1-2_T0-2_D1 | 240 | EQLLEVLLRVLH*YLLFLQLDLHCGGDVNLKSI*SLMSLLRRIQKCTLAS*RGSH*GSFKL   | 299 |
| TaBAK1-2_D(WT)   | 301 | ASDNFSNKNILGRGGFGKVYKGR*LTGTLVAVKRLKEERTPGGELQFQTEVEMISMAVHR    | 360 |
| TaBAK1-2_T0-2_D1 | 300 | LAITSAIRTF*EEVALERCTRGD*RMVHW*QLKD*KKNVLLVANSNSKQSK*LVWQCIG     | 359 |
| TaBAK1-2_D(WT)   | 361 | NLLRLRGFCMTPTERLLVYPYMANGSVASRLRERGPNEPALEWEKRTRIALGSARGLSYL    | 420 |
| TaBAK1-2_T0-2_D1 | 360 | TCFDSVDSA*HLQNGY*SIHTWLTVALHHVCESEGQMSRLLNGKKELGLHWDLPEDCLTC    | 419 |
| TaBAK1-2_D(WT)   | 421 | HDHCDPKIIHRDVKAANILLDEDFEAVVGDFGLAKLMDYKDTHVTTAVRGTTIGHIAPEYL   | 480 |
| TaBAK1-2_T0-2_D1 | 420 | MITVIPRSFIVMSKPQTF*SWMKTLRRLWVTL*DWPSLWTT*RTL*PQPSVERS*GILLPSTY | 479 |
| TaBAK1-2_D(WT)   | 481 | STGKSSEKTDVFGYGIMLLELITGQRAFDLARLANDDDVMLLDWVKGLLKEKKVEMLVDP    | 540 |
| TaBAK1-2_T0-2_D1 | 480 | PPESP*PRRMFSVTASCFW*SLSLGRGHSTSHVLQTTTMS*CLTG*KGC*KRRRWRCW*WTR  | 539 |
| TaBAK1-2_D(WT)   | 541 | DLQSVYVEHEVEALIQVALLCTQGSPMDRPMSEVVRMLEGDGLAERWEEWQKVEVVRQE     | 600 |
| TaBAK1-2_T0-2_D1 | 540 | TCRACTWSTRWRR*SRWRCCARRGRRWTGPRCRRW*GCWRATG*WRSAGRSGR*RWWSGRR   | 599 |
| TaBAK1-2_D(WT)   | 601 | AELAPRNNDWIVDSTYNLRAVELSGPR                                     | 627 |
| TaBAK1-2_T0-2_D1 | 600 | RSWPRETTTGSSTPPTTSGRWSSPARG                                     | 626 |

**Figure S15**

Protein alignment of the *tabak1-2* T0 plant 2 D1 allele to the WT.



**A**

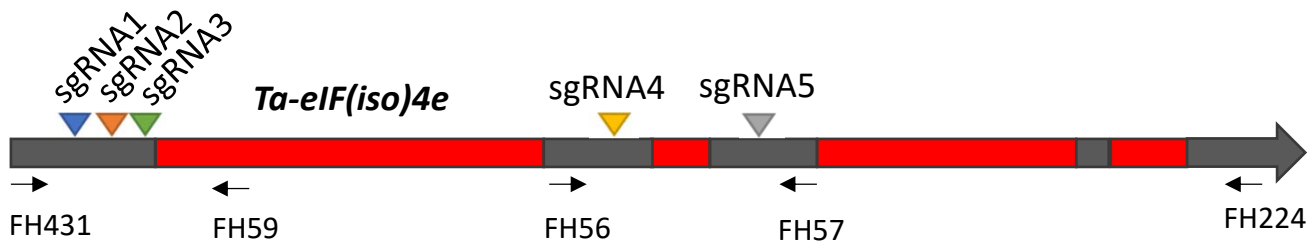

B

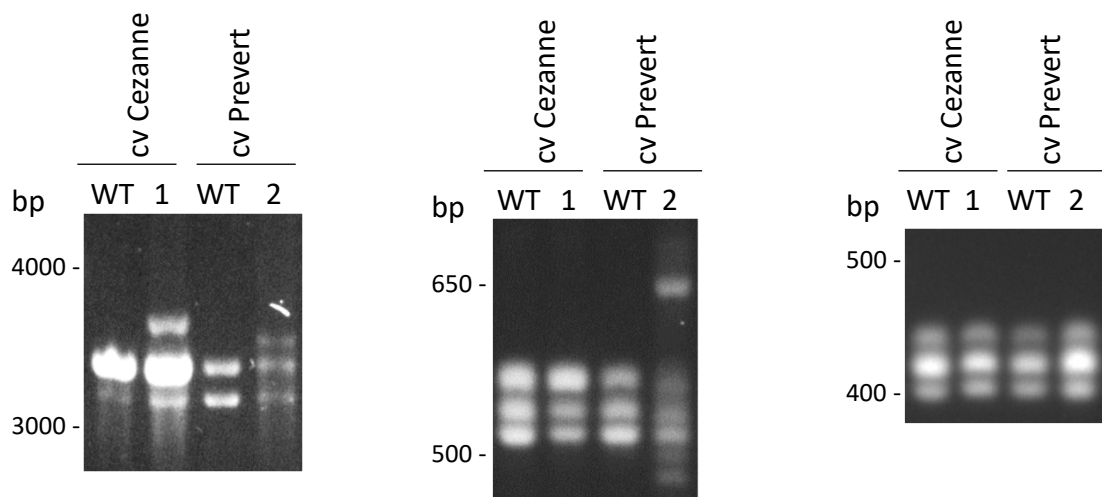

PCR primers: FH431/  
FH224

FH431/  
FH59

FH56/  
FH57

**Figure S17**

PCR genotyping of the *ta-elf(iso)4e* T0 plants 1 and 2 (cvs Cezanne and Prevert, respectively). (A) A cartoon showing positions of sgRNA target sites and PCR primer binding sites within the *Ta-elf(iso)4e* gene. Exons are shown in grey, while introns – in red. (B) Results of PCR genotyping with three primer sets.

## *ta-eif4e*

T0 Plant 1 (cv Cezanne)

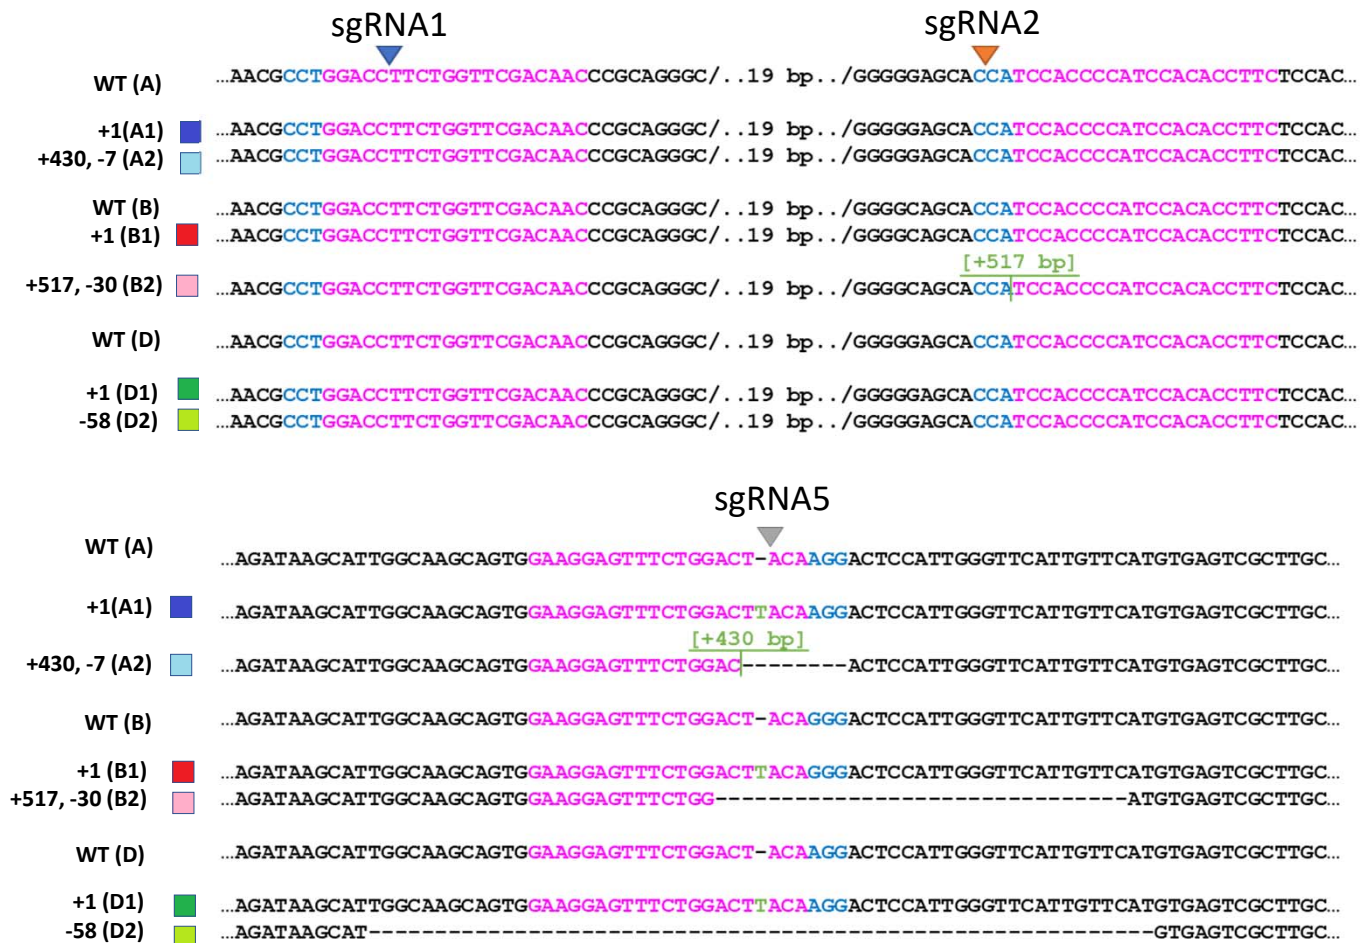

T0 Plant 2 (cv Goncourt)

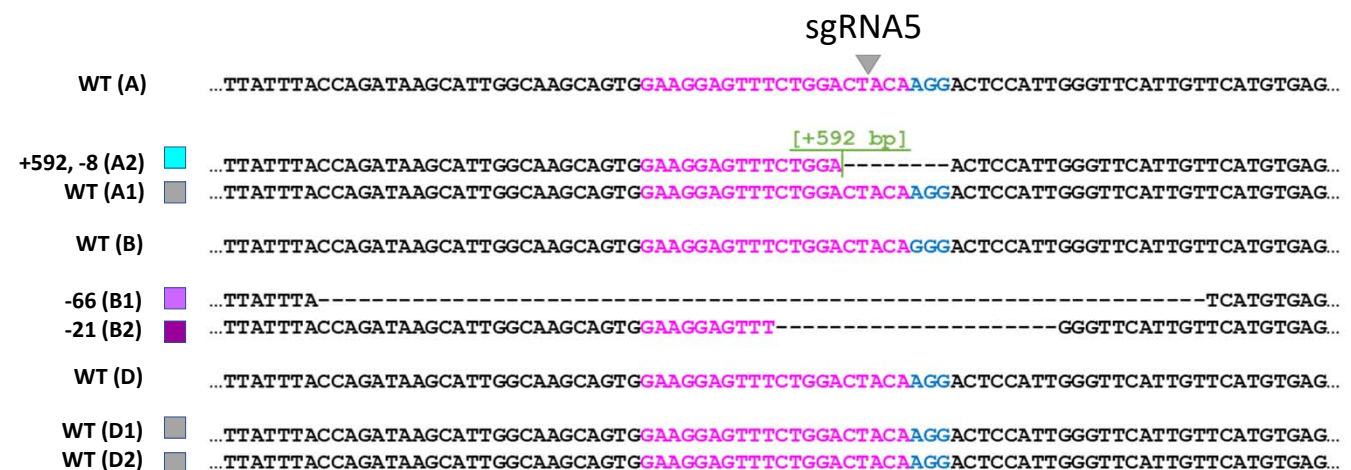

**Figure S18**

Alignments showing CRISPR/Cas-induced indels in *Ta-eif4e* homoeologues in two *ta-eif4e* T0 plants (cvs Cezanne and Goncourt).

## A

|                  |     |                                                               |     |
|------------------|-----|---------------------------------------------------------------|-----|
| Ta-eIF4e_A(WT)   | 1   | MAEDTETRPASAGAEEREERGEIADDGDGSSAAAAGRITAHPLENAWTFWFDNPQGKSRQV | 60  |
|                  |     | MAEDTETRPASAGAEEREERGEIADDGDGSSAAAAGRITAHPLENAWTFWFDNPQGKSRQV |     |
| Ta-eIF4e_T0-1_A1 | 1   | MAEDTETRPASAGAEEREERGEIADDGDGSSAAAAGRITAHPLENAWTFWFDNPQGKSRQV | 60  |
| Ta-eIF4e_A(WT)   | 61  | AWGSTIHPIHTFSTVEDFWGLYNNIHNPSKLNVGADFHCFKNKIEPKWEDPICANGGKWT  | 120 |
|                  |     | AWGSTIHPIHTFSTVEDFWGLYNNIHNPSKLNVGADFHCFKNKIEPKWEDPICANGGKWT  |     |
| Ta-eIF4e_T0-1_A1 | 61  | AWGSTIHPIHTFSTVEDFWGLYNNIHNPSKLNVGADFHCFKNKIEPKWEDPICANGGKWT  | 120 |
| Ta-eIF4e_A(WT)   | 121 | ISCGRGKSDTFWLHTLLAMIGEQDFGDEICGAVVSVRQKQERVAIWTKNAANEAQAQISI  | 180 |
|                  |     | ISCGRGKSDTFWLHTLLAMIGEQDFGDEICGAVVSVRQKQERVAIWTKNAANEAQAQISI  |     |
| Ta-eIF4e_T0-1_A1 | 121 | ISCGRGKSDTFWLHTLLAMIGEQDFGDEICGAVVSVRQKQERVAIWTKNAANEAQAQISI  | 180 |
| Ta-eIF4e_A(WT)   | 181 | GKQWKEFLDYKDSIGFIVHEDAKRSDKGPKNRYTV*                          | 216 |
|                  |     | GKQWKEFLD + K + P+                                            |     |
| Ta-eIF4e_T0-1_A1 | 181 | GKQWKEFLDLQGLHWVHCS*GCKEV*QRPQEPLHRL                          | 216 |

## B

|                  |     |                                                               |     |
|------------------|-----|---------------------------------------------------------------|-----|
| Ta-eIF4e_A(WT)   | 1   | MAEDTETRPASAGAEEREERGEIADDGDGSSAAAAGRITAHPLENAWTFWFDNPQGKSRQV | 60  |
|                  |     | MAEDTETRPASAGAEEREERGEIADDGDGSSAAAAGRITAHPLENAWTFWFDNPQGKSRQV |     |
| Ta-eIF4e_T0-1_A2 | 1   | MAEDTETRPASAGAEEREERGEIADDGDGSSAAAAGRITAHPLENAWTFWFDNPQGKSRQV | 60  |
| Ta-eIF4e_A(WT)   | 61  | AWGSTIHPIHTFSTVEDFWGLYNNIHNPSKLNVGADFHCFKNKIEPKWEDPICANGGKWT  | 120 |
|                  |     | AWGSTIHPIHTFSTVEDFWGLYNNIHNPSKLNVGADFHCFKNKIEPKWEDPICANGGKWT  |     |
| Ta-eIF4e_T0-1_A2 | 61  | AWGSTIHPIHTFSTVEDFWGLYNNIHNPSKLNVGADFHCFKNKIEPKWEDPICANGGKWT  | 120 |
| Ta-eIF4e_A(WT)   | 121 | ISCGRGKSDTFWLHTLLAMIGEQDFGDEICGAVVSVRQKQERVAIWTKNAANEAQAQISI  | 180 |
|                  |     | ISCGRGKSDTFWLHTLLAMIGEQDFGDEICGAVVSVRQKQERVAIWTKNAANEAQAQ +   |     |
| Ta-eIF4e_T0-1_A2 | 121 | ISCGRGKSDTFWLHTLLAMIGEQDFGDEICGAVVSVRQKQERVAIWTKNAANEAQAQTPL  | 180 |
| Ta-eIF4e_A(WT)   | 181 | GKQWKEFLDYKDSIGFIVHEDAKRSDKGPKNRYTV*                          | 216 |
|                  |     | G + ++ +                                                      |     |
| Ta-eIF4e_T0-1_A2 | 181 | GSLFMRMQRLTKAPRTATPFE*ALASSGRSFW---                           | 213 |

**Figure S19**

Protein alignments of the *ta-eif4e* T0 plant 1 A1 (A) and A2 (B) alleles to the WT.

## A

|                  |     |                                                               |     |
|------------------|-----|---------------------------------------------------------------|-----|
| Ta-eIF4e_B(WT)   | 1   | MAEDTETRPASAGAEEREERGEIADDGDGSSAAAAGRISAHPLENAWTFWFDNPQGKSRQV | 60  |
|                  |     | MAEDTETRPASAGAEEREERGEIADDGDGSSAAAAGRISAHPLENAWTFWFDNPQGKSRQV |     |
| Ta-eIF4e_T0-1_B1 | 1   | MAEDTETRPASAGAEEREERGEIADDGDGSSAAAAGRISAHPLENAWTFWFDNPQGKSRQV | 60  |
| Ta-eIF4e_B(WT)   | 61  | AWGSTIHPIHTFSTVEDFWGLYNNIHNPSKLVGADFHCFCNKIEPKWEDPICANGGKWT   | 120 |
|                  |     | AWGSTIHPIHTFSTVEDFWGLYNNIHNPSKLVGADFHCFCNKIEPKWEDPICANGGKWT   |     |
| Ta-eIF4e_T0-1_B1 | 61  | AWGSTIHPIHTFSTVEDFWGLYNNIHNPSKLVGADFHCFCNKIEPKWEDPICANGGKWT   | 120 |
| Ta-eIF4e_B(WT)   | 121 | ISCGRGKSDTFWLHTLLAMIGEQDFGDEICGAVSVRQKQERVAIWTKNAANEAQISI     | 180 |
|                  |     | ISCGRGKSDTFWLHTLLAMIGEQDFGDEICGAVSVRQKQERVAIWTKNAANEAQISI     |     |
| Ta-eIF4e_T0-1_B1 | 121 | ISCGRGKSDTFWLHTLLAMIGEQDFGDEICGAVSVRQKQERVAIWTKNAANEAQISI     | 180 |
| Ta-eIF4e_B(WT)   | 181 | GKQWKEFLDYRDSIGFIVHEDAKRSDKGPKNRYTV* 216                      |     |
|                  |     | GKQWKEFLD + K + P+                                            |     |
| Ta-eIF4e_T0-1_B1 | 181 | GKQWKEFLDLQGLHWVHCS*GCKEV*QRPQEPLHRL 216                      |     |

## B

|                  |     |                                                               |     |
|------------------|-----|---------------------------------------------------------------|-----|
| Ta-eIF4e_B(WT)   | 1   | MAEDTETRPASAGAEEREERGEIADDGDGSSAAAAGRISAHPLENAWTFWFDNPQGKSRQV | 60  |
|                  |     | MAEDTETRPASAGAEEREERGEIADDGDGSSAAAAGRISAHPLENAWTFWFDNPQGKSRQV |     |
| Ta-eIF4e_T0-1_B2 | 1   | MAEDTETRPASAGAEEREERGEIADDGDGSSAAAAGRISAHPLENAWTFWFDNPQGKSRQV | 60  |
| Ta-eIF4e_B(WT)   | 61  | AWGSTIHPIHTFSTVEDFWGLYNNIHNPSKLVGADFHCFCNKIEPKWEDPICANGGKWT   | 120 |
|                  |     | AWGSTI S L + A F +E +                                         |     |
| Ta-eIF4e_T0-1_B2 | 61  | AWGSTIQW*TGQSGPCRLASLASCPTAQYRTRKAAP*SAAYLEVTVVHDDEYFTVYN     | 120 |
| Ta-eIF4e_B(WT)   | 121 | ISCGRGKSDTFWLHTLLAMIGEQDFGDEICGAVSVRQKQERVAIWTKNAANEAQISI     | 180 |
|                  |     | ++ D + V + +++ +A                                             |     |
| Ta-eIF4e_T0-1_B2 | 121 | ELTKVKYVTEGMRKPAFLSGEQKKAIVDLLFKTNRKVTDETKKIMKSIPSAERLEPSQDS  | 180 |
| Ta-eIF4e_B(WT)   | 181 | GKQWKEFLDYRDSIGFIVHEDAKRSDKGPKNRYTV*----- 216                 |     |
|                  |     | K+ L R + + H S                                                |     |
| Ta-eIF4e_T0-1_B2 | 181 | PKRNTGKLAIRTCITYRSHPCNTASSTDLTQTRI*HKHEQK*NYRALIMDRNADLEKVEP  | 240 |
| Ta-eIF4e_B(WT)   |     | -----                                                         |     |
| Ta-eIF4e_T0-1_B2 | 241 | HPHLLHRRGLLGHLHRRGLLGPLQQYP*P*QVECGSRLPLLQE*D*A*MGRPHLCQWR*   | 300 |
| Ta-eIF4e_B(WT)   |     | -----                                                         |     |
| Ta-eIF4e_T0-1_B2 | 301 | MDHQLWQREI*HILVAYFAGNDW*TIRLW*RNLWSSR*RASETGKSSYLD*ECCQ*SCSD  | 360 |
| Ta-eIF4e_B(WT)   |     | -----                                                         |     |
| Ta-eIF4e_T0-1_B2 | 361 | KHWQAVEGVSG*GCKEV*QRPQEPLHRL                                  | 388 |

**Figure S20**

Protein alignments of the *ta-eif4e* T0 plant 1 B1 (A) and B2 (B) alleles to the WT.

A

|                  |     |                                                               |     |
|------------------|-----|---------------------------------------------------------------|-----|
| Ta-eIF4e_D(WT)   | 1   | MAEDTETRPASAGAEEREERGEIADDGDGSSAAAAGRITAHPLENAWTFWFDNPQGKSRQV | 60  |
|                  |     | MAEDTETRPASAGAEEREERGEIADDGDGSSAAAAGRITAHPLENAWTFWFDNPQGKSRQV |     |
| Ta-eIF4e_T0-1_D1 | 1   | MAEDTETRPASAGAEEREERGEIADDGDGSSAAAAGRITAHPLENAWTFWFDNPQGKSRQV | 60  |
| Ta-eIF4e_D(WT)   | 61  | AWGSTIHPIHTFSTVEDFWGLYNNIHNPSKLNVGADFHCFKNKIEPKWEDPICANGGKWT  | 120 |
|                  |     | AWGSTIHPIHTFSTVEDFWGLYNNIHNPSKLNVGADFHCFKNKIEPKWEDPICANGGKWT  |     |
| Ta-eIF4e_T0-1_D1 | 61  | AWGSTIHPIHTFSTVEDFWGLYNNIHNPSKLNVGADFHCFKNKIEPKWEDPICANGGKWT  | 120 |
| Ta-eIF4e_D(WT)   | 121 | ISCGRGKSDTFWLHTLLAMIGEQFDFGDEICGAVVSVRQKQERVAIWTKNAANEAQAQISI | 180 |
|                  |     | ISCGRGKSDTFWLHTLLAMIGEQFDFGDEICGAVVSVRQKQERVAIWTKNAANEAQAQISI |     |
| Ta-eIF4e_T0-1_D1 | 121 | ISCGRGKSDTFWLHTLLAMIGEQFDFGDEICGAVVSVRQKQERVAIWTKNAANEAQAQISI | 180 |
| Ta-eIF4e_D(WT)   | 181 | GKQWKEFLDYKDSIGFIVHEDAKRSDKGPKNRYTV* 216                      |     |
|                  |     | GKQWKEFLD + K + P+                                            |     |
| Ta-eIF4e_T0-1_D1 | 181 | GKQWKEFLDLQGLHWVHCS*GCKEV*QRPQEPLHRL 216                      |     |

B

|                  |     |                                                               |     |
|------------------|-----|---------------------------------------------------------------|-----|
| Ta-eIF4e_D(WT)   | 1   | MAEDTETRPASAGAEEREERGEIADDGDGSSAAAAGRITAHPLENAWTFWFDNPQGKSRQV | 60  |
|                  |     | MAEDTETRPASAGAEEREERGEIADDGDGSSAAAAGRITAHPLENAWTFWFDNPQGKSRQV |     |
| Ta-eIF4e_T0-1_D2 | 1   | MAEDTETRPASAGAEEREERGEIADDGDGSSAAAAGRITAHPLENAWTFWFDNPQGKSRQV | 60  |
| Ta-eIF4e_D(WT)   | 61  | AWGSTIHPIHTFSTVEDFWGLYNNIHNPSKLNVGADFHCFKNKIEPKWEDPICANGGKWT  | 120 |
|                  |     | AWGSTIHPIHTFSTVEDFWGLYNNIHNPSKLNVGADFHCFKNKIEPKWEDPICANGGKWT  |     |
| Ta-eIF4e_T0-1_D2 | 61  | AWGSTIHPIHTFSTVEDFWGLYNNIHNPSKLNVGADFHCFKNKIEPKWEDPICANGGKWT  | 120 |
| Ta-eIF4e_D(WT)   | 121 | ISCGRGKSDTFWLHTLLAMIGEQFDFGDEICGAVVSVRQKQERVAIWTKNAANEAQAQISI | 180 |
|                  |     | ISCGRGKSDTFWLHTLLAMIGEQFDFGDEICGAVVSVRQKQERVAIWTKNAANEAQAQIS+ |     |
| Ta-eIF4e_T0-1_D2 | 121 | ISCGRGKSDTFWLHTLLAMIGEQFDFGDEICGAVVSVRQKQERVAIWTKNAANEAQAQISM | 180 |
| Ta-eIF4e_D(WT)   | 181 | GKQWKEFLDYKDSIGFIVHEDAKRSDKGPKNRYTV* 216                      |     |
|                  |     | Q + + F                                                       |     |
| Ta-eIF4e_T0-1_D2 | 181 | RMQRGLTKAPRTATPF----- 196                                     |     |

**Figure S21**

Protein alignments of the *ta-eif4e* T0 plant 1 D1 (A) and D2 (B) alleles to the WT.



|                  |     |                                                               |     |
|------------------|-----|---------------------------------------------------------------|-----|
| Ta-eIF4e_A(WT)   | 1   | MAEDTETRPASAGAEEREERGEIADDGDGSSAAAAGRITAHPLENAWTFWFDNPQGKSRQV | 60  |
| Ta-eIF4e_T0-2_A2 | 1   | MAEDTETRPASAGAEEREERGEIADDGDGSSAAAAGRITAHPLENAWTFWFDNPQGKSRQV | 60  |
| Ta-eIF4e_A(WT)   | 61  | AWGSTIHPIHTFSTVEDFWGLYNNIHNPSKLNVGADDFHCFKNKIEPKWEDPICANGGKWT | 120 |
| Ta-eIF4e_T0-2_A2 | 61  | AWGSTIHPIHTFSTVEDFWGLYNNIHNPSKLNVGADDFHCFKNKIEPKWEDPICANGGKWT | 120 |
| Ta-eIF4e_A(WT)   | 121 | ISCGRGKSDTFWLHTLLAMIGEQDFGDEICGAVVSVRQKQERVAIWTKNAANEAAQISI   | 180 |
| Ta-eIF4e_T0-2_A2 | 121 | ISCGRGKSDTFWLHTLLAMIGEQDFGDEICGAVVSVRQKQERVAIWTKNAANEAAQISI   | 180 |
| Ta-eIF4e_A(WT)   | 181 | GKQWKEFLDYKDSIGFIVHEDAKRSDKGPKNRYTV*-----                     | 216 |
| Ta-eIF4e_T0-2_A2 | 181 | GKQWKEFL+ + + S + ++ *                                        | 240 |
| Ta-eIF4e_A(WT)   |     | -----                                                         |     |
| Ta-eIF4e_T0-2_A2 | 241 | LNPKP*TLKP*QP*TLNPKP*TLNLKP*TLNPNPNPKP*TLNPKP*TLNPNPKP*TLNPK  | 300 |
| Ta-eIF4e_A(WT)   |     | -----                                                         |     |
| Ta-eIF4e_T0-2_A2 | 301 | P*TQP*TLNPKP*TLNPKP*TLTLNPKPQTLNPNPMAAQ*HSCRYLRASHDRH*SGYLAD  | 360 |
| Ta-eIF4e_A(WT)   |     | -----                                                         |     |
| Ta-eIF4e_T0-2_A2 | 361 | KSKRT*RCLGRSSGGGT*SGS*TGSTPLGSLFMRMRGLTKAPRTATPF              | 410 |

**Figure S22**

Protein alignment of the *ta-eif4e* T0 plant 2 A2 allele to the WT.

## A

|                  |     |                                                               |     |
|------------------|-----|---------------------------------------------------------------|-----|
| Ta-eIF4e_B(WT)   | 1   | MAEDTETRPASAGAEEREERGEIADDGDGSSAAAAGRISAHPLENAWTFWFDNPQGKSRQV | 60  |
|                  |     | MAEDTETRPASAGAEEREERGEIADDGDGSSAAAAGRISAHPLENAWTFWFDNPQGKSRQV |     |
| Ta-eIF4e_T0-2_B1 | 1   | MAEDTETRPASAGAEEREERGEIADDGDGSSAAAAGRISAHPLENAWTFWFDNPQGKSRQV | 60  |
| Ta-eIF4e_B(WT)   | 61  | AWGSTIHPIHTFSTVEDFWGLYNNIHNPSKLNVGADFHCFKNKIEPKWEDPICANGGKWT  | 120 |
|                  |     | AWGSTIHPIHTFSTVEDFWGLYNNIHNPSKLNVGADFHCFKNKIEPKWEDPICANGGKWT  |     |
| Ta-eIF4e_T0-2_B1 | 61  | AWGSTIHPIHTFSTVEDFWGLYNNIHNPSKLNVGADFHCFKNKIEPKWEDPICANGGKWT  | 120 |
| Ta-eIF4e_B(WT)   | 121 | ISCGRGKSDTFWLHTLLAMIGEQDFDGEICGAVSVRQKQERVAIWTKNAANEAAQISI    | 180 |
|                  |     | ISCGRGKSDTFWLHTLLAMIGEQDFDGEICGAVSVRQKQERVAIWTKNAANEAAQ       |     |
| Ta-eIF4e_T0-2_B1 | 121 | ISCGRGKSDTFWLHTLLAMIGEQDFDGEICGAVSVRQKQERVAIWTKNAANEAAQS*G    | 180 |
| Ta-eIF4e_B(WT)   | 181 | GKQWKEFLDYRDSIGFIVHEDAKRSDKGPKNRYTV*                          | 216 |
|                  |     | K+ +                                                          |     |
| Ta-eIF4e_T0-2_B1 | 181 | CKEV*QRPQEPLHRL-----                                          | 195 |

## B

|                  |     |                                                               |     |
|------------------|-----|---------------------------------------------------------------|-----|
| Ta-eIF4e_B(WT)   | 1   | MAEDTETRPASAGAEEREERGEIADDGDGSSAAAAGRISAHPLENAWTFWFDNPQGKSRQV | 60  |
|                  |     | MAEDTETRPASAGAEEREERGEIADDGDGSSAAAAGRISAHPLENAWTFWFDNPQGKSRQV |     |
| Ta-eIF4e_T0-2_B2 | 1   | MAEDTETRPASAGAEEREERGEIADDGDGSSAAAAGRISAHPLENAWTFWFDNPQGKSRQV | 60  |
| Ta-eIF4e_B(WT)   | 61  | AWGSTIHPIHTFSTVEDFWGLYNNIHNPSKLNVGADFHCFKNKIEPKWEDPICANGGKWT  | 120 |
|                  |     | AWGSTIHPIHTFSTVEDFWGLYNNIHNPSKLNVGADFHCFKNKIEPKWEDPICANGGKWT  |     |
| Ta-eIF4e_T0-2_B2 | 61  | AWGSTIHPIHTFSTVEDFWGLYNNIHNPSKLNVGADFHCFKNKIEPKWEDPICANGGKWT  | 120 |
| Ta-eIF4e_B(WT)   | 121 | ISCGRGKSDTFWLHTLLAMIGEQDFDGEICGAVSVRQKQERVAIWTKNAANEAAQISI    | 180 |
|                  |     | ISCGRGKSDTFWLHTLLAMIGEQDFDGEICGAVSVRQKQERVAIWTKNAANEAAQISI    |     |
| Ta-eIF4e_T0-2_B2 | 121 | ISCGRGKSDTFWLHTLLAMIGEQDFDGEICGAVSVRQKQERVAIWTKNAANEAAQISI    | 180 |
| Ta-eIF4e_B(WT)   | 181 | GKQWKEFLDYRDSIGFIVHEDAKRSDKGPKNRYTV*                          | 216 |
|                  |     | GKQWKEF FIVHEDAKRSDKGPKNRYTV                                  |     |
| Ta-eIF4e_T0-2_B2 | 181 | GKQWKEFG-----FIVHEDAKRSDKGPKNRYTV-                            | 208 |

**Figure S23**

Protein alignments of the *ta-eif4e* T0 plant 2 B1 (A) and B2 (B) alleles to the WT.

# *ta-eif(iso)4e*

T0 Plant 1 (cv Cezanne)

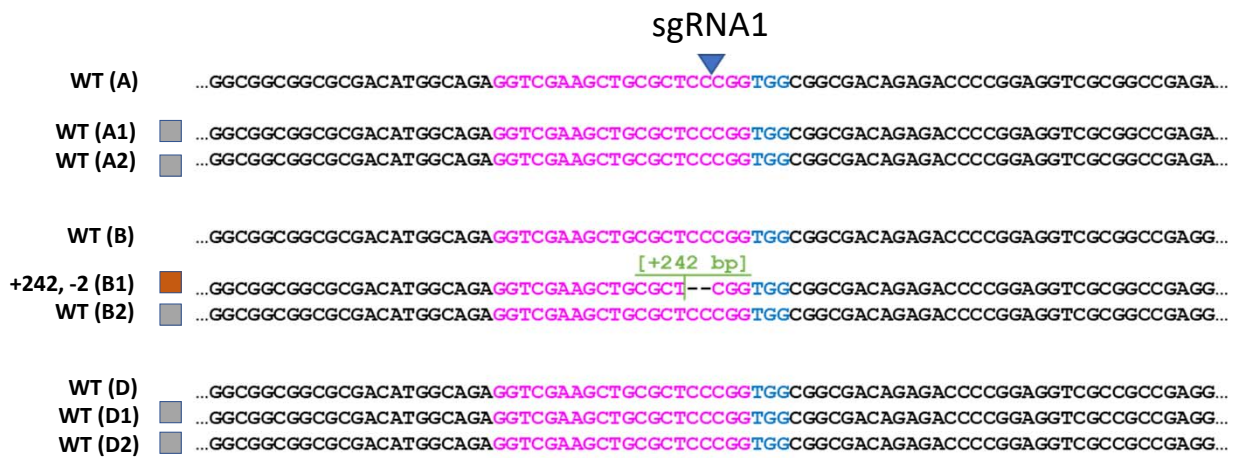

**Figure S24**

Alignment showing CRISPR/Cas-induced indels in *Ta-eIF(iso)4e* homoeologues in the *ta-eif(iso)4e* T0 plant 1 (cv Cezanne).

# ta-elf(iso)4e

T0 Plant 2 (cv Prevert)

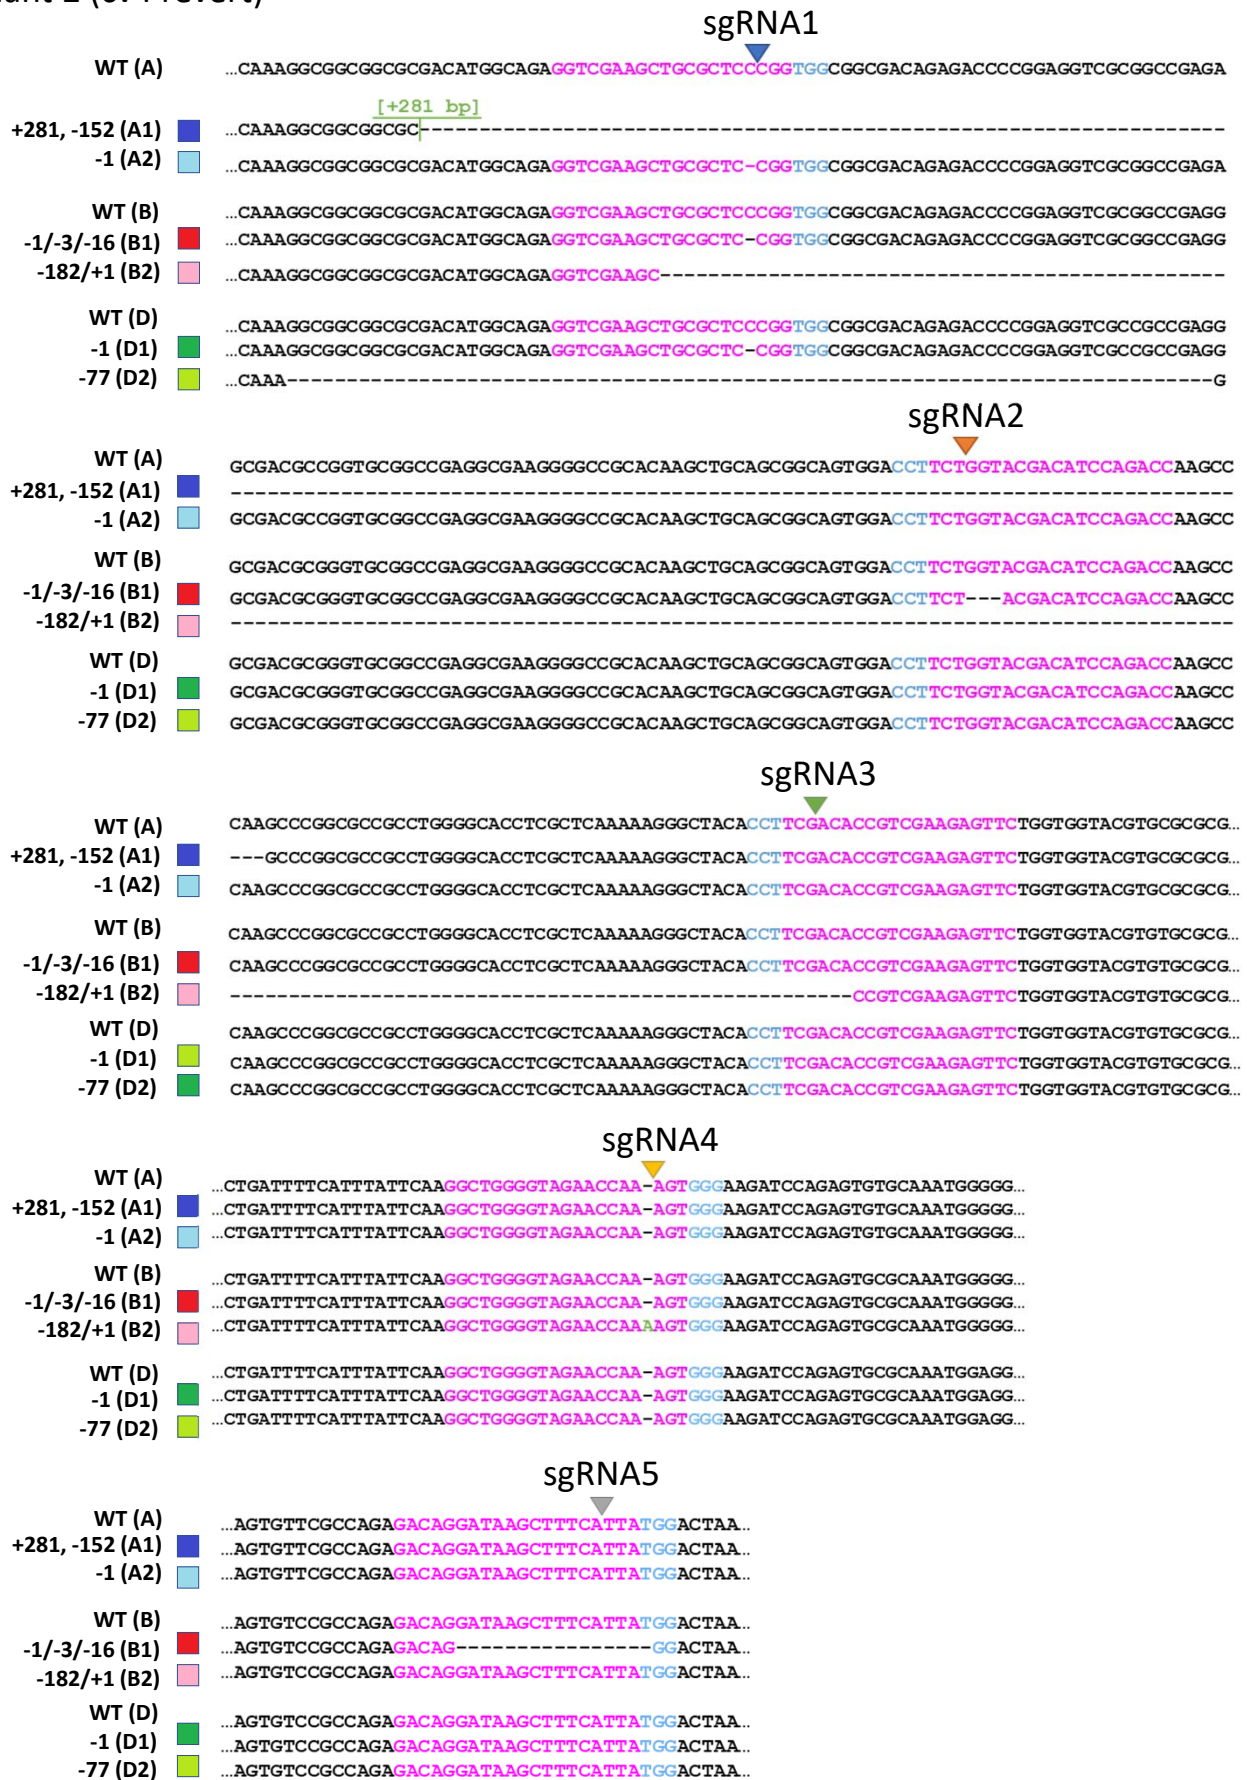

**Figure S25**

Alignment showing CRISPR/Cas-induced indels in *Ta-elf(iso)4e* homoeologues in the *ta-elf(iso)4e* T0 plant 2 (cv Prevert).

|                       |     |                                                               |     |
|-----------------------|-----|---------------------------------------------------------------|-----|
| Ta-eIF(iso)4e_B(WT)   | 1   | MAEVEAAL-----P-----                                           | 9   |
|                       |     | MAEVEAAL                  P                                   |     |
| Ta-eIF(iso)4e_T0-1_B1 | 1   | MAEVEAALSPVPVTSSSLLSRRADETLPQHSAGS*VRGTSLS*TCADHGGAVLFFLFH*   | 60  |
| Ta-eIF(iso)4e_B(WT)   | 10  | -----VAATETPEVAAEGDAGAAEAKGPHKLQRQWT                          | 40  |
|                       |     | VAATETPEVAAEGDAGAAEAKGPHKLQRQWT                               |     |
| Ta-eIF(iso)4e_T0-1_B1 | 61  | IWEHIV*ISEQF*KFHDLF*NQDFF*KNSVAATETPEVAAEGDAGAAEAKGPHKLQRQWT  | 120 |
| Ta-eIF(iso)4e_B(WT)   | 41  | FWYDIQTKPKPGAAGWTSKKGYTFDTVEEFWCLYDQIFRPSKLVGSADFHLFKAGVEPK   | 100 |
|                       |     | FWYDIQTKPKPGAAGWTSKKGYTFDTVEEFWCLYDQIFRPSKLVGSADFHLFKAGVEPK   |     |
| Ta-eIF(iso)4e_T0-1_B1 | 121 | FWYDIQTKPKPGAAGWTSKKGYTFDTVEEFWCLYDQIFRPSKLVGSADFHLFKAGVEPK   | 180 |
| Ta-eIF(iso)4e_B(WT)   | 101 | WEDPECANGGKWTVISSRKANLDTMWLETMCALIGEQQFDESQEICGVVASVRQRQDKLSL | 160 |
|                       |     | WEDPECANGGKWTVISSRKANLDTMWLETMCALIGEQQFDESQEICGVVASVRQRQDKLSL |     |
| Ta-eIF(iso)4e_T0-1_B1 | 181 | WEDPECANGGKWTVISSRKANLDTMWLETMCALIGEQQFDESQEICGVVASVRQRQDKLSL | 240 |
| Ta-eIF(iso)4e_B(WT)   | 161 | WTKTASNEAVQVDIGKKWKEVIDYNDKMVYSFHDDSRSQKPSRGGRYTV*            | 210 |
|                       |     | WTKTASNEAVQVDIGKKWKEVIDYNDKMVYSFHDDSRSQKPSRGGRYTV*            |     |
| Ta-eIF(iso)4e_T0-1_B1 | 241 | WTKTASNEAVQVDIGKKWKEVIDYNDKMVYSFHDDSRSQKPSRGGRYTV*            | 290 |

**Figure S26**

Protein alignment of the *ta-eif(iso)4e* T0 plant 1 B1 allele to the WT.

## A

|                       |     |                                                                |     |
|-----------------------|-----|----------------------------------------------------------------|-----|
| Ta-eIF(iso)4e_A(WT)   | 1   | -----MAEVEAALPVAATETPEVAAESDAGAAEAKGPHKLQRQWTFWYDIQTKPKPG      | 52  |
|                       |     | + + S A Q                                                      |     |
| Ta-eIF(iso)4e_T0-2_A1 | 1   | MALMMSFLRKSI CRFSSSGKRR* TDRGTPSRMLATSPAIRDSTNVQNAVSTTSAESFAFF | 60  |
| Ta-eIF(iso)4e_A(WT)   | 53  | AAWGTSLKKGYTFDTVEEFWCFFGSLYDQIFRPSKLVGSADFLFKAGVEPKWEDPECAN    | 112 |
|                       |     | ++W ++ ++ + + F +                                              |     |
| Ta-eIF(iso)4e_T0-2_A1 | 61  | SSWASARRRLGHLAQKGLHLRHRRRVLVV* SDFPSE*AGRKC*FSFIQGWGRTKVGRSR   | 120 |
| Ta-eIF(iso)4e_A(WT)   | 113 | GGKWTVISSRKANLDTMWLET CMALIGE QFDESQEICGVVASVRQRQDKLSLWTKTASNE | 172 |
|                       |     | KW + + G + + G + R + +                                         |     |
| Ta-eIF(iso)4e_T0-2_A1 | 121 | VCKWGMDCDI*QEGQS*YHVA*NVYGSDWRAVR*EPGNLWCCR*CSPETG*AFIMD*DC    | 180 |
| Ta-eIF(iso)4e_A(WT)   | 173 | AVQVDIGKKWKEVIDYNDKMVYSFHDDSR SQKPSRGGRYTV*--- 214             |     |
|                       |     | G W+E+ R + S +                                                 |     |
| Ta-eIF(iso)4e_T0-2_A1 | 181 | Q**SCSGGHWQEMEGGY*LQ**DGLQLPR*LEKSETKQRWTIHRV                  | 225 |

## B

|                       |     |                                                                |     |
|-----------------------|-----|----------------------------------------------------------------|-----|
| Ta-eIF(iso)4e_A(WT)   | 1   | MAEVEAALPVAATETPEVAAESDAGAAEAKGPHKLQRQWTFWYDIQTKPKPGA          | 60  |
|                       |     | MAEVEAAL + +G + P P K                                          |     |
| Ta-eIF(iso)4e_T0-2_A2 | 1   | MAEVEAALRWRQRPRRSRPRATPVRPRRRGR TSCSGSGPSGTTSRPSPSPAPPAPRSK    | 60  |
| Ta-eIF(iso)4e_A(WT)   | 61  | KGYTFDTVEEFWCFFGSLYDQIFRPSKLVGSADFLFKAGVEPKWEDPECANGGKWTVIS    | 120 |
|                       |     | + + + ++ L+ F + G + G                                          |     |
| Ta-eIF(iso)4e_T0-2_A2 | 61  | RATPSTPSKSSGACMIRFSVRVSW*EVLI---FIYSRLG*NQSGKIQSVQMGANGL*YL    | 116 |
| Ta-eIF(iso)4e_A(WT)   | 121 | SRKANLDTMWLET CMALIGE QFDESQEICGVVASVRQRQDKLSLWTKTASNEAVQVDIGK | 180 |
|                       |     | + + L L+ + +++ + + + + + + +                                   |     |
| Ta-eIF(iso)4e_T0-2_A2 | 117 | AGRPILIPCGLKRVWL*LESSMRARKFVVL SLVFARDRISFHYGLRLPVMKLFRTTLAR   | 176 |
| Ta-eIF(iso)4e_A(WT)   | 181 | KWKEVIDYNDKMVYSFHDDSR SQKPSRGGRYTV* 214                        |     |
|                       |     | + ++ + + + +                                                   |     |
| Ta-eIF(iso)4e_T0-2_A2 | 177 | NGRRLLTMTIRWSTASTMTREVRNQA EVDDTPC- 209                        |     |

**Figure S27**

Protein alignments of the *ta-eif(iso)4e* T0 plant 2 A1 (A) and A2 (B) alleles to the WT.

## A

|                       |     |                                                                |     |
|-----------------------|-----|----------------------------------------------------------------|-----|
| Ta-eIF(iso)4e_B(WT)   | 1   | MAEVEAALPVAATETPEVAAEGDAGAAEAKGPHKLQRQWTFWYDIQTKPKPGAAGTSLK    | 60  |
|                       |     | MAEVEAAL +G + S +                                              |     |
| Ta-eIF(iso)4e_T0-2_B1 | 1   | MAEVEAALRWRRQRPRRSRPRATRVPRRRGRGTSCSGSGPSTTSRPSPPAPPAPRPSKR    | 60  |
| Ta-eIF(iso)4e_B(WT)   | 61  | KGYTFDFTVEEFWCLYDQIFRPSK-LVGSADFHLFKAGVEPKWEDPECANGGKWTVISSRK  | 119 |
|                       |     | + + C+ R S V + K + + G ++ R                                    |     |
| Ta-eIF(iso)4e_T0-2_B1 | 61  | ATPSTPSKSSGACMIRFSVRVSW*EVLIFIYSRLG*NQSGKIQSAQMGANGL*-YLAGRP   | 119 |
| Ta-eIF(iso)4e_B(WT)   | 120 | ANLDTMWLETTCMALIGEQQFDESQEICGVVASVRQRQDKLSLWTKTASNEAVQVDIGKKWK | 179 |
|                       |     | + + L + + ++ S R R ++ S G+ W+                                  |     |
| Ta-eIF(iso)4e_T0-2_B1 | 120 | ILIPCGLKRVWL*LESSLMKARKFVVLLLVSARDRD*--DCQ*RSCT-----GRHWQ      | 169 |
| Ta-eIF(iso)4e_B(WT)   | 180 | EVIDYN-DKMVYSFHDDRSQKPSRGGRYTV*--                              | 210 |
|                       |     | E+ + + +K R+T+                                                 |     |
| Ta-eIF(iso)4e_T0-2_B1 | 170 | EMEGGD*LQ**DGLQLPR*LKKSETKQRWTIHGV                             | 203 |

## B

|                       |     |                                                                |     |
|-----------------------|-----|----------------------------------------------------------------|-----|
| Ta-eIF(iso)4e_B(WT)   | 1   | MAEVEAALPVAATETPEVAAEGDAGAAEAKGPHKLQRQWTFWYDIQTKPKPGAAGTSLK    | 60  |
|                       |     | MAEVEA V + +E A K + W + + A G                                  |     |
| Ta-eIF(iso)4e_T0-2_B2 | 1   | MAEVEARRRVLVLV*SDFPSE*----AGRKC*FSFIQGWGRKSGKIQSAQMGANGL*YL    | 56  |
| Ta-eIF(iso)4e_B(WT)   | 61  | KGYTFDFTVEEFWCLYDQIFRPSKLVGSADFHLFKAGVEPKWEDPECANGGKWTVISSRKA  | 120 |
|                       |     | G RP L G++ W E + ++ +R                                         |     |
| Ta-eIF(iso)4e_T0-2_B2 | 57  | AG-----RP-----ILIPCGLKRVWL*LESS-----LMKAR--                    | 82  |
| Ta-eIF(iso)4e_B(WT)   | 121 | NLDTMWLETTCMALIGEQQFDESQEICGVVASVRQRQDKLSLWTKTASNEAVQVDIGKKWKE | 180 |
|                       |     | + L + I + R + L+ T + +                                         |     |
| Ta-eIF(iso)4e_T0-2_B2 | 83  | KFVVLLLVLSARDRISFHYG-----LRLPVMKLF*TLARNGRR*-----LTT           | 124 |
| Ta-eIF(iso)4e_B(WT)   | 181 | VIDYNDKMVYSFHDDRSQKPSRGGRYTV*                                  | 210 |
|                       |     | +I ++ + + R+Q R                                                |     |
| Ta-eIF(iso)4e_T0-2_B2 | 125 | MIRWS--TASTMTQEVNRQAQVDDTRC---                                 | 149 |

**Figure S28**

Protein alignments of the *ta-eif(iso)4e* T0 plant 2 B1 (A) and B2 (B) alleles to the WT.



## A

```

Ta-eIF(iso)4e_D(WT)      1 MAEVEAALPVAATETPEVAAEGDAGAAEAKGPHKLQRQWTFWYDIQTKPKPGAAWGTSLK  60
                           MAEVEAAL                               +G                               + P P                               K
Ta-eIF(iso)4e_T0-2_D1    1 MAEVEAALRWRRQRPRRSPPRATRVRPRRRGRTSCSGSGPSGTTSRPSPSPAPPGAPRSK  60

Ta-eIF(iso)4e_D(WT)      61 KGYTFDFTVEEFWCLYDQIFRPSKLVGSADFHLFKAG--VEPKWEDPECANGGKWTVISSR 118
                           +       +       +       F   + G       K + +       G   ++ R
Ta-eIF(iso)4e_T0-2_D1    61 RATPSTPSKSSGACMIRFSVRVSW*EVLIFIYSRLG*NQSGKIQSAQMEANGL*-YLAGR 119

Ta-eIF(iso)4e_D(WT)      119 KTNLDTMWLETMCALIGEQFDESQEICGVVASVRQRQDKLSLWTKTASNEAVQVDIGKKW 178
                           +       + L       + + ++ S R R       +       + + + +
Ta-eIF(iso)4e_T0-2_D1    120 PILIPCGLKRVWL*LESSSMKARKFVVLVLLVSARDRIS-FHYGLRLPVMKLFRTWLARNG 178

Ta-eIF(iso)4e_D(WT)      179 KEVIDYNDKMYVSFHDSDRSQKPSRGGRYTV* 210
                           + ++       +       +       + +
Ta-eIF(iso)4e_T0-2_D1    179 RRLLTMMIRWSTASTMTQEVNRQAEDDTPS- 209

```

## B

```

Ta-eIF(iso)4e_D(WT)      1 MAEVEAALPVAATETPEVAAEGDAGAAEAKGPHKLQRQWTFWYDIQTKPKPGAAWGTSLK  60
                           V   +                               F Y       + G       ++
Ta-eIF(iso)4e_T0-2_D2    1 ----MIRFSVRVSW*-----EVLIFIYSRLG*NQSGKIQSAQME  35

Ta-eIF(iso)4e_D(WT)      61 KGYTFDFTVEEFWCLYDQIFRPSKLVGSADFHLFKAGVEPKWEDPECANGGKWTVISSRKT 120
                           L G       L   G++ W   E +       S +
Ta-eIF(iso)4e_T0-2_D2    36 ANGL*-----YLAGRP--ILIPCGLKRVWL*LESS-----SMKAR  68

Ta-eIF(iso)4e_D(WT)      121 NLDTMWLETMCALIGEQFDESQEICGVVASVRQRQDKLSLWTKTASNEAVQVDIGKKWKE 180
                           + L +       I   +       +R   KL  WT  +   +   + +W
Ta-eIF(iso)4e_T0-2_D2    69 KRVVLLVLSARDRISFHYG-----LRLPVMKLFRTWLARNGRRLTMM-IRWST 116

Ta-eIF(iso)4e_D(WT)      181 VIDYNDKMYVSFHDSDRSQKPSRGGRYTV* 210
                           ++       D
Ta-eIF(iso)4e_T0-2_D2    117 ASTMTQEVNRQAEDDTPS----- 135

```

**Figure S29**

Protein alignments of the *ta-eif(iso)4e* T0 plant 2 D1 (A) and D2 (B) alleles to the WT.
